# Supplementary material for: Synthesis, structures, and photophysical properties of π-extended arsaborins
Source: Royal Society of Chemistry journal article supplement (doi:10.1039/d3dt03798c), 2023-12-20
Supplement: d3dt03798c1.pdf [file d3dt03798c1.pdf]

# Synthesis, Structures and Photophysical Properties of $\pi$ - Extended Arsaborins

Akifumi Sumida,<sup>[a]</sup> Tomoharu Onishi,<sup>[a]</sup> Hiroaki Imoto,<sup>[a,b]\*</sup> and Kensuke Naka,<sup>[a,c]\*</sup>

[a] Faculty of Molecular Chemistry and Engineering, Graduate School of Science and Technology,

Kyoto Institute of Technology, Goshokaido-cho, Matsugasaki, Sakyo-ku, Kyoto 606-8585, Japan.

[b] FOREST, JST, Honcho 4-1-8, Kawaguchi, Saitama 332-0012, Japan.

[c] Materials Innovation Lab, Kyoto Institute of Technology, Goshokaido-cho, Matsugasaki, Sakyo-  
ku, Kyoto 606-8585, Japan.

## Contents:

- 1 Synthesis
- 2 Crystallographic data
- 3 Photophysical properties
- 4 DFT calculation
- 5 NMR spectra

## 1. Synthesis

### Diiodophenylarsine (PhAsI<sub>2</sub>)

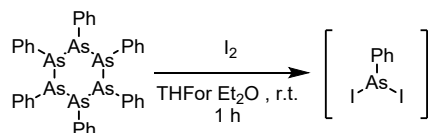

I<sub>2</sub> (6.0 eq.) was directly added to the mixture of As<sub>6</sub>Ph<sub>6</sub> (1.0 eq.) in ethereal solution and stirred for 1 h at room temperature. Without isolation, the ethereal solution was used for the next reactions.

### Bis(*o*-bromophenyl)phenylarsine (**2a**)

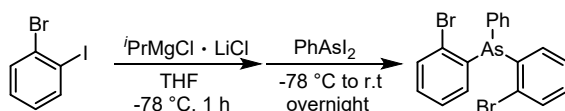

To a solution of 1-bromo-2-iodobenzene (3.91 g, 13.9 mmol) in THF (30 mL) was added *i*PrMgCl·LiCl (1.0 M in THF, 13.5 mL, 13.5 mmol) at  $-78\text{ }^{\circ}\text{C}$  and the mixture was stirred for 1 h at the same temperature. Then, separately prepared PhAsI<sub>2</sub> (1.10 mmol) in THF (6.6 mL) was added into the mixture at the same temperature, and the mixture was warmed to room temperature. After stirring at room temperature overnight, the mixture was quenched with *sat.* NH<sub>4</sub>Cl *aq.* and extracted with DCM. The extracts were dried over anhydrous Na<sub>2</sub>SO<sub>4</sub> and after filtration, the volatiles were removed in *vacuo*. The crude product was purified by column chromatography on silica gel (eluent: *n*-hexane/EtOAc = 100/1). The residue was further purified by recrystallization (DCM/*n*-hexane) to obtain **2a** as colorless solids (2.48 g, 82%). <sup>1</sup>H-NMR (CDCl<sub>3</sub>, 400 MHz): 7.59 (m, 2H), 7.45-7.27 (m, 5H), 7.25-7.15 (m, 4H), 6.88-6.77 (m, 2H) ppm; <sup>13</sup>C-NMR (CDCl<sub>3</sub>, 100 MHz): 141.3, 138.2, 135.0, 134.1, 132.9, 130.5, 130.3, 129.1, 127.8 ppm. HR-FAB-MASS (*m/z*): calculated for C<sub>18</sub>H<sub>13</sub>Br<sub>2</sub>As [M]<sup>+</sup>; 461.8600, observed; 461.8589.

### Bis(2-bromonaphthyl)phenylarsine (**2b**)

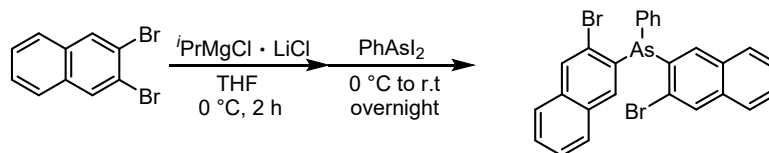

To a solution of 2,3-dibromonaphthalene (1.48 g, 5.18 mmol) in THF (10 mL) was added *i*PrMgCl·LiCl (1.0 M in THF, 5.40 mL, 5.40 mmol) at 0 °C and the mixture was stirred for 2 h at the same temperature. Then, separately prepared PhAsI<sub>2</sub> (2.48 mmol) in THF (2.5 mL) was added into the mixture at the same temperature, and the mixture was warmed to room temperature. After stirring at

room temperature overnight, the mixture was quenched with *sat.*  $\text{NH}_4\text{Cl aq.}$  and extracted with DCM. The extracts were dried over anhydrous  $\text{Na}_2\text{SO}_4$  and after filtration, the volatiles were removed in vacuo. The crude product was purified by column chromatography on silica gel (eluent: *n*-hexane/EtOAc = 50/1). The residue was further purified by recrystallization (DCM/*n*-hexane) to obtain **2b** as colorless solids (0.952 g, 68%).  $^1\text{H-NMR}$  ( $\text{CDCl}_3$ , 400 MHz):  $\delta$  8.13 (s, 2H), 7.78 (d,  $J$  = 8.0 Hz, 2H), 7.55-7.49 (m, 4H), 7.44-7.33 (m, 7H), 7.26 (s, 2H) ppm;  $^{13}\text{C-NMR}$  ( $\text{CDCl}_3$ , 100 MHz):  $\delta$  139.2, 138.3, 135.3, 134.6, 134.2, 132.3, 131.0, 129.1, 128.0, 127.3, 126.7, 126, 126.3 ppm. HR-FAB-MASS ( $m/z$ ): calculated for  $\text{C}_{26}\text{H}_{17}\text{Br}_2\text{As}$   $[\text{M}]^+$ ; 561.8913, observed; 561.8902.

#### Bis(2-bromothiényl)phenylarsine (**2c**)

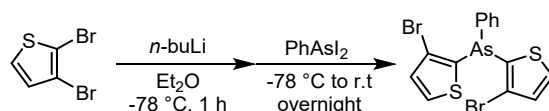

To a solution of 2,3-dibromothiophene (4.89 g, 20.2 mmol) in ether (40 mL) was added *n*-BuLi (1.6 M in *n*-hexane, 12.3 mL, 19.7 mmol) at  $-78\text{ }^\circ\text{C}$  and the mixture was stirred for 1 h at the same temperature. Then, separately prepared  $\text{PhAsI}_2$  (9.87 mmol) in ether (10 mL) was added into the mixture at the same temperature, and the mixture was warmed to room temperature. After stirring at room temperature overnight, the mixture was quenched with water and extracted with DCM. The extracts were dried over anhydrous  $\text{Na}_2\text{SO}_4$  and after filtration, the volatiles were removed in vacuo. The crude product was purified by column chromatography on neutral alumina (eluent: *n*-hexane/EtOAc = 50/1). The solvents were removed in vacuo, and the residue was further purified by recrystallization (DCM/*n*-hexane) to obtain **2c** as colorless solids (2.54 g, 57%).  $^1\text{H-NMR}$  ( $\text{CDCl}_3$ , 400 MHz):  $\delta$  7.45-7.34 (m, 7H), 7.09 (d,  $J$  = 8.0 Hz, 2H) ppm;  $^{13}\text{C-NMR}$  ( $\text{CDCl}_3$ , 100 MHz):  $\delta$  137.3, 134.1, 133.1, 132.0, 131.7, 129.7, 129.0, 118.4 ppm. HR-FAB-MASS ( $m/z$ ): calculated for  $\text{C}_{14}\text{H}_9\text{Br}_2\text{S}_2\text{As}$   $[\text{M}]^+$ ; 473.7728, observed; 473.7725.

#### Bis(3-bromothiényl)phenylarsine (**2d**)

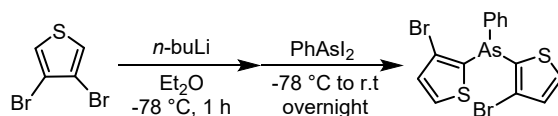

To a solution of 3,4-dibromothiophene (3.34 g, 13.8 mmol) in ether (30 mL) was added *n*-BuLi (1.6 M in *n*-hexane, 9.00 mL, 14.4 mmol) at  $-78\text{ }^\circ\text{C}$  and the mixture was stirred for 1 h at the same temperature. Then, separately prepared  $\text{PhAsI}_2$  (6.60 mmol) in ether (6.6 mL) was added into the mixture at the same temperature, and the mixture was warmed to room temperature. After stirring at room temperature overnight, the mixture was quenched with water and extracted with DCM. The extracts were dried over anhydrous  $\text{Na}_2\text{SO}_4$  and after filtration, the volatiles were removed in vacuo.

The crude product was purified by column chromatography on silica gel (eluent: *n*-hexane/EtOAc = 50/1). The residue was further purified by recrystallization (DCM/*n*-hexane) to obtain **2d** as colorless solids (2.04 g, 65%). <sup>1</sup>H-NMR (CDCl<sub>3</sub>, 400 MHz): δ 7.47-7.32 (m, 7H), 6.73 (d, *J* = 0.6 Hz, 2H) ppm; <sup>13</sup>C-NMR (CDCl<sub>3</sub>, 100 MHz): δ 138.4, 137.6, 133.4, 131.2, 129.1, 129.0, 124.2, 115.3 ppm. HR-FAB-MASS (m/z): calculated for C<sub>14</sub>H<sub>9</sub>Br<sub>2</sub>S<sub>2</sub>As [M]<sup>+</sup>; 473.7728, observed; 473.7725.

#### Bis(4-bromothiophenyl)phenylarsine (**2e**)

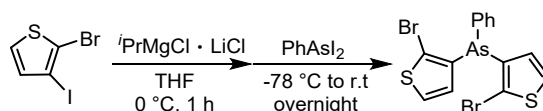

To a solution of 2-bromo-3-iodothiophene (0.496 g, 1.72 mmol) in THF (3.5 mL) was added *i*PrMgCl·LiCl (1.0 M in THF, 1.80 mL, 1.80 mmol) at -78 °C and the mixture was stirred for 30 min at the same temperature. Then, separately prepared PhAsI<sub>2</sub> (0.865 mmol) in THF (1.7 mL) was added into the mixture at the same temperature, and the mixture was warmed to room temperature. After stirring at room temperature overnight, the mixture was quenched with water and extracted with DCM. The extracts were dried over anhydrous Na<sub>2</sub>SO<sub>4</sub> and after filtration, the volatiles were removed in vacuo. The crude product was purified by column chromatography on neutral alumina (eluent: *n*-hexane). The residue was further purified by recrystallization (DCM/*n*-hexane) to obtain **2e** as colorless solids (0.409g, 66%). <sup>1</sup>H-NMR (CDCl<sub>3</sub>, 400 MHz): δ 7.37-7.34 (m, 5H), 7.23-7.21 (d, *J* = 8.0 Hz, 2H), 6.41-6.40 (d, *J* = 4.0 Hz, 2H) ppm; <sup>13</sup>C-NMR (CDCl<sub>3</sub>, 100 MHz): δ 138.4, 138.2, 133.0, 131.9, 128.9, 128.8, 126.9, 118.1 ppm. HR-FAB-MASS (m/z): calculated for C<sub>14</sub>H<sub>9</sub>Br<sub>2</sub>S<sub>2</sub>As [M]<sup>+</sup>; 473.7728, observed; 473.7716.

#### Dibenzoarsaborine (**3a**)

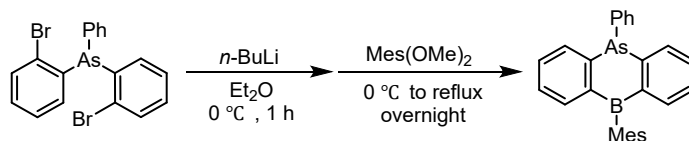

To a solution of **2a** (0.504 g, 1.08 mmol) in ether (17 mL) was added *n*-BuLi (1.6 M in hexane, 1.40 mL, 0.880 mmol) at 0 °C. The mixture was stirred for 1 h at 0 °C. Then, a solution of MesB(OMe)<sub>2</sub> (0.221 g, 1.15 mmol) in ether (4.4 mL) was added into the mixture at the same temperature and the resultant suspension was refluxed overnight. The mixture was quenched with *sat.* NH<sub>4</sub>Cl *aq* and extracted with DCM. The extracts were dried over anhydrous Na<sub>2</sub>SO<sub>4</sub> and after filtration, the volatiles were removed in vacuo. The crude product was purified by column chromatography on silica gel (eluent: *n*-hexane/EtOAc = 50/1). The residue was further purified by recrystallization (DCM/*n*-hexane) to obtain **3a** as colorless solids (0.377 g, 80%). <sup>1</sup>H-NMR (CDCl<sub>3</sub>, 400 MHz): δ 7.77 (d, *J* = 8.0 Hz, 2H), 7.71 (d, *J* = 8.0 Hz, 2H), 7.46 (t, *J* = 8.0, 8.0 Hz, 2H), 7.38-7.28 (m, 4H), 7.24-7.16

(m, 3H), 6.92 (s, 2H), 2.40 (s, 3H), 2.00 (s, 3H), 1.96 (s, 3H) ppm;  $^{11}\text{B}$ -NMR ( $\text{CDCl}_3$ , 128 MHz):  $\delta$  68.0 ppm;  $^{13}\text{C}$ -NMR ( $\text{CDCl}_3$ , 100 MHz):  $\delta$  151.7, 143.0, 141.1, 140.1, 138.1, 137.9, 136.7, 133.6, 133.4, 132.5, 128.7, 128.4, 128.2, 127.0, 22.7, 21.3 ppm. HR-FAB-MASS (m/z): calculated for  $\text{C}_{27}\text{H}_{24}\text{BAs}$   $[\text{M}]^+$ ; 434.1187, observed; 434.1176.

### Dinaphthoarsaborin (**3b**)

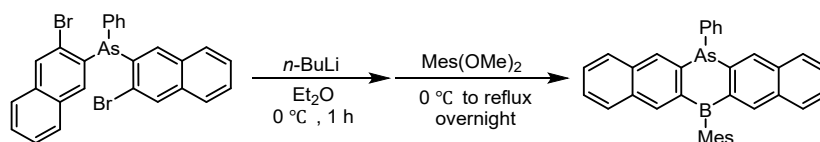

To a solution of **2b** (0.500 g, 0.900 mmol) in ether (20 mL) was added *n*-BuLi (1.6 M in hexane, 1.20 mL, 0.750 mmol) at 0 °C. The mixture was stirred for 1 h at 0 °C. Then, a solution of MesB(OMe)<sub>2</sub> (0.182 g, 0.95 mmol) in ether (2.0 mL) was added into the mixture at the same temperature and the resultant suspension was refluxed overnight. The mixture was quenched with *sat.*  $\text{NH}_4\text{Cl}$  *aq* and extracted with DCM. The extracts were dried over anhydrous  $\text{Na}_2\text{SO}_4$  and after filtration, the volatiles were removed in *vacuo*. The crude product was purified by column chromatography on silica gel (eluent: *n*-hexane/EtOAc = 100/1). The residue was further purified by recrystallization (DCM/*n*-hexane) to obtain **3b** as pale yellow solids (0.295 g, 61%).  $^1\text{H}$ -NMR ( $\text{CDCl}_3$ , 400 MHz):  $\delta$  8.33 (d,  $J$  = 4.0 Hz, 4H), 7.86 (d,  $J$  = 8.0 Hz, 2H), 7.81 (d,  $J$  = 4.0 Hz, 2H), 7.57 (t,  $J$  = 8.0, 8.0 Hz, 2H), 7.46 (t,  $J$  = 4.0, 4.0 Hz, 2H), 7.20-7.14 (m, 2H), 7.12-7.02 (m, 3H), 7.00 (s, 1H), 6.90 (s, 1H), 2.45 (s, 3H), 2.08 (s, 3H), 1.72 (s, 3H) ppm;  $^{13}\text{C}$ -NMR ( $\text{CDCl}_3$ , 100 MHz):  $\delta$  144.9, 144.2, 143.8, 142.0, 138.6, 138.4, 138.0, 136.7, 135.4, 133.9, 133.2, 132.3, 129.9, 128.8, 128.4, 127.7, 127.5, 127.2, 127.1, 126.4, 23.1, 22.4, 21.4 ppm. HR-FAB-MASS (m/z): calculated for  $\text{C}_{35}\text{H}_{28}\text{BAs}$   $[\text{M}]^+$ ; 534.1500, observed; 534.1492.

### 2-Thienoarsaborin (**3c**)

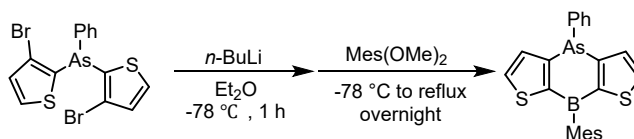

To a solution of **2c** (0.251 g, 0.528 mmol) in ether (10 mL) was added *n*-BuLi (1.6 M in hexane, 0.69 mL, 1.1 mmol) at -78 °C. The mixture was stirred for 1 h at -78 °C. Then, a solution of MesB(OMe)<sub>2</sub> (0.106 g, 0.552 mmol) in ether (1.1 mL) was added into the mixture at the same temperature and the resultant suspension was refluxed overnight. The mixture was quenched with *sat.*  $\text{NH}_4\text{Cl}$  *aq* and extracted with DCM. The extracts were dried over anhydrous  $\text{Na}_2\text{SO}_4$  and after filtration, the volatiles were removed in *vacuo*. The crude product was purified by column chromatography on silica gel (eluent: *n*-hexane/EtOAc = 50/1). The residue was further purified by recrystallization (DCM/*n*-hexane) to obtain **3c** as colorless solids (0.147 g, 63%).  $^1\text{H}$ -NMR ( $\text{CDCl}_3$ , 400 MHz):  $\delta$  7.52 (d,  $J$  = 4.0

Hz, 2H) , 7.39-7.33 (m, 2H) , 7.28 (d,  $J = 4.0$  Hz, 2H) , 7.29-7.22 (m, 3H) , 6.91 (s, 1H) , 6.89 (s, 1H) , 2.37 (s, 3H) , 2.08 (s, 3H) , 2.02 (s, 3H) ppm;  $^{11}\text{B}$ -NMR ( $\text{CDCl}_3$ , 128 MHz):  $\delta$  58.3 ppm;  $^{13}\text{C}$ -NMR ( $\text{CDCl}_3$ , 100 MHz):  $\delta$  156.4, 146.7, 142.4, 141.7, 137.7, 136.7, 135.8, 132.0, 129.3, 129.2, 129.1, 129.0, 127.0, 127.0, 22.2, 22.5, 21.3 ppm. HR-FAB-MASS ( $m/z$ ): calculated for  $\text{C}_{23}\text{H}_{20}\text{S}_2\text{BAs}$   $[\text{M}]^+$ ; 446.0315, observed; 446.0309.

### 3-Thienoarsaborin (**3d**)

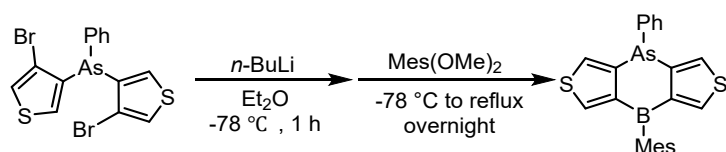

To a solution of **2d** (0.501 g, 1.05 mmol) in ether (20 mL) was added *n*-BuLi (1.6 M in hexane, 1.40 mL, 0.880 mmol) at  $-78$  °C. The mixture was stirred for 1 h at  $-78$  °C. Then, a solution of  $\text{MesB}(\text{OMe})_2$  (0.222 g, 1.14 mmol) in ether (3.0 mL) was added into the mixture at the same temperature and the resultant suspension was refluxed overnight. The mixture was quenched with *sat.*  $\text{NH}_4\text{Cl}$  *aq.* and extracted with DCM. The extracts were dried over anhydrous  $\text{Na}_2\text{SO}_4$  and after filtration, the volatiles were removed in *vacuo*. The crude product was purified by column chromatography on silica gel (eluent: *n*-hexane/ $\text{EtOAc} = 50/1$ ). The residue was further purified by recrystallization (DCM/*n*-hexane) to obtain **3d** as colorless solids (0.243 g, 53%).  $^1\text{H}$ -NMR ( $\text{CDCl}_3$ , 400 MHz):  $\delta$  8.01 (d,  $J = 4.0$  Hz, 2H) , 7.67 (d,  $J = 4.0$  Hz, 2H) , 7.25-7.10 (m, 5H) , 6.89 (s, 1H) , 6.84 (s, 1H) , 2.35 (s, 3H) , 2.06 (s, 3H) , 1.87 (s, 3H) ppm;  $^{11}\text{B}$ -NMR ( $\text{CDCl}_3$ , 128 MHz):  $\delta$  52.7 ppm;  $^{13}\text{C}$ -NMR ( $\text{CDCl}_3$ , 100 MHz):  $\delta$  145.2, 144.9, 144.3, 142.1, 130.7, 140.3, 138.5, 138.1, 136.8, 131.5, 129.9, 128.5, 127.9, 127.0, 127.0, 22.9, 22.5, 21.3 ppm. HR-FAB-MASS ( $m/z$ ): calculated for  $\text{C}_{23}\text{H}_{20}\text{S}_2\text{BAs}$   $[\text{M}]^+$ ; 446.0315, observed; 446.0322.

### 4-Thienoarsaborin (**3e**)

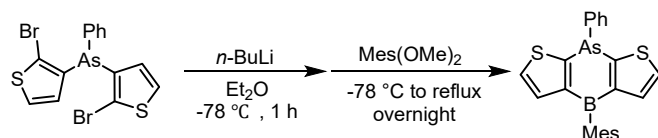

To a solution of **2e** (0.807 g, 1.68 mmol) in ether (30 mL) was added *n*-BuLi (1.6 M in hexane, 2.20 mL, 3.52 mmol) at  $-78$  °C. The mixture was stirred for 1 h at  $-78$  °C. Then, a solution of  $\text{MesB}(\text{OMe})_2$  (0.342 g, 1.76 mmol) in ether (4.0 mL) was added into the mixture at the same temperature and the resultant suspension was refluxed overnight. The mixture was quenched with *sat.*  $\text{NH}_4\text{Cl}$  *aq.* and extracted with DCM. The extracts were dried over anhydrous  $\text{Na}_2\text{SO}_4$  and after filtration, the volatiles were removed in *vacuo*. The crude product was purified by column chromatography on silica gel (eluent: *n*-hexane/ $\text{EtOAc} = 50/1$ ). The residue was further purified by recrystallization (DCM/*n*-

hexane) to obtain **3e** as colorless solids (0.602 g, 63%). <sup>1</sup>H-NMR (CDCl<sub>3</sub>, 400 MHz): δ 7.93 (d, *J* = 4.0 Hz, 2H), 7.48 (d, *J* = 0.4 Hz, 2H), 7.35-7.20 (m, 5H), 6.91 (s, 1H), 2.38 (s, 3H), 2.18 (s, 3H), 2.12 (s, 3H) ppm; <sup>11</sup>B-NMR (CDCl<sub>3</sub>, 128 MHz): δ 51.0 ppm; <sup>13</sup>C-NMR (CDCl<sub>3</sub>, 100 MHz): δ 153.0, 144.9, 140.2, 139.5, 138.5, 138.4, 137.4, 137.3, 133.0, 129.1, 128.9, 128.8, 127.1, 22.8, 22.7, 21.4 ppm. HR-FAB-MASS (*m/z*): calculated for C<sub>23</sub>H<sub>20</sub>S<sub>2</sub>BA<sub>s</sub> [M]<sup>+</sup>; 446.0315, observed; 446.0317.

#### Dibenzoarsaborin sulfide (**3a-S**)

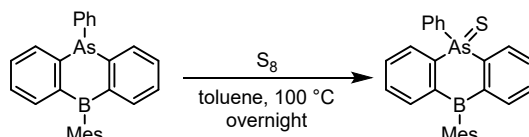

A toluene solution (2.0 mL) of **3a** (0.402 g, 0.92 mmol) and S<sub>8</sub> (0.147 g, 4.68 mmol) was stirred overnight under N<sub>2</sub> atmosphere at 100 °C. The residual S<sub>8</sub> was filtered off, and the volatiles were removed in vacuo. The crude product was purified by column chromatography on silica gel (eluent: *n*-hexane/EtOAc = 2/1). The residue was further purified by recrystallization (DCM/*n*-hexane) to obtain **3a-S** as a pale yellow solids (0.182 g, 43%). <sup>1</sup>H-NMR (CDCl<sub>3</sub>, 400 MHz): δ 8.21 (d, *J* = 4.0 Hz, 2H), 7.77 (d, *J* = 4.0 Hz, 2H), 7.73 (t, *J* = 8.0, 8.0 Hz, 2H), 7.70 (d, *J* = 8.0 Hz, 2H), 7.63 (t, *J* = 8.0, 0.4 Hz, 3H), 6.94 (d, *J* = 16.0 Hz, 2H), 2.40 (s, 3H), 1.99 (s, 3H), 1.98 (s, 3H) ppm; <sup>11</sup>B-NMR (CDCl<sub>3</sub>, 128 MHz): δ 60.3 ppm; <sup>13</sup>C-NMR (CDCl<sub>3</sub>, 100 MHz): δ 151.7, 143.1, 141.0, 140.1, 138.3, 137.6, 135.0, 133.5, 133.4, 132.5, 131.9, 131.5, 131.0, 130.0, 129.1, 128.7, 128.2, 127.4, 22.9, 22.7, 21.3 ppm. HR-FAB-MASS (*m/z*): calculated for C<sub>27</sub>H<sub>25</sub>SBA<sub>s</sub> [M+H]<sup>+</sup>; 467.0980, observed; 467.0995.

#### Dibenzoarsaborin gold(I) chloride complex (**3a-AuCl**)

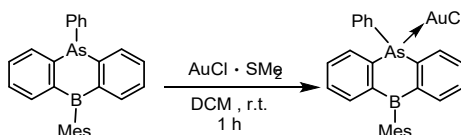

A DCM solution (1.0 mL) of **3a** (50.3 mg, 0.12 mmol) and AuCl·SMe<sub>2</sub> (35.6 mg, 0.12 mmol) was stirred for 1 h under N<sub>2</sub> atmosphere at room temperature. Insoluble impurities were removed by filtration, and the volatiles were removed from the filtrate in vacuo. The residue was subjected to recrystallization (DCM/hexane) to obtain **3a-AuCl** as a colorless solid (51.4 mg, 67%). <sup>1</sup>H-NMR (CDCl<sub>3</sub>, 400 MHz): δ 7.90 (dd, *J* = 8.0, 0.4 Hz, 2H), 7.83 (dd, *J* = 8.0, 0.4 Hz, 2H), 7.67 (td, *J* = 8.0, 0.4 Hz, 2H), 7.53-7.49 (m, 4H), 7.47-7.35 (m, 3H), 6.96 (s, 1H), 6.92 (s, 1H), 2.40 (s, 3H), 2.00 (s, 3H), 1.94 (s, 3H) ppm; <sup>13</sup>C-NMR (CDCl<sub>3</sub>, 100 MHz): δ 141.7, 140.3, 138.1, 137.6, 137.5, 134.7, 134.2, 133.7, 132.5, 131.4, 131.2, 129.6, 127.4, 127.3, 22.9, 22.6, 21.3 ppm. HR-FAB-MASS (*m/z*): calculated for C<sub>27</sub>H<sub>24</sub>BA<sub>s</sub>Au [M-Cl]<sup>+</sup>; 631.0857, observed; 631.0855.

## 2. X-ray crystallographic data for single crystalline products

**Table S1.** Crystallographic Data of **3a-c**.

|                                         | <b>3a</b>                                       | <b>3b</b>                                                                                    | <b>3c</b>                                                      |
|-----------------------------------------|-------------------------------------------------|----------------------------------------------------------------------------------------------|----------------------------------------------------------------|
| Crystal data                            |                                                 |                                                                                              |                                                                |
| Empirical Formula                       | C <sub>27</sub> H <sub>24</sub> BA <sub>s</sub> | C <sub>35</sub> H <sub>28</sub> BA <sub>s</sub> B,<br>+0.5(CH <sub>2</sub> Cl <sub>2</sub> ) | C <sub>23</sub> H <sub>20</sub> S <sub>2</sub> BA <sub>s</sub> |
| Formula Weight                          | 434.19                                          | 576.77                                                                                       | 446.24                                                         |
| Crystal Dimension, mm <sup>3</sup>      | 0.69 × 0.44 × 0.12                              | 0.91 × 0.15 × 0.05                                                                           | 0.52 × 0.11 × 0.085                                            |
| Crystal System                          | triclinic                                       | Triclinic                                                                                    | triclinic                                                      |
| Space Group                             | <i>P</i> -1                                     | <i>P</i> -1                                                                                  | <i>P</i> -1                                                    |
| a, Å                                    | 9.0332 (9)                                      | 11.0750(5)                                                                                   | 10.0361(6)                                                     |
| b, Å                                    | 11.559 (2)                                      | 16.3776(7)                                                                                   | 12.8683(8)                                                     |
| c, Å                                    | 12.589 (2)                                      | 16.4079(8)                                                                                   | 17.689(1)                                                      |
| α, deg                                  | 114.40 (2)                                      | 86.788(4)                                                                                    | 108.955(6)                                                     |
| β, deg                                  | 91.53 (1)                                       | 75.613(4)                                                                                    | 91.163(5)                                                      |
| γ, deg                                  | 112.13 (1)                                      | 74.804(4)                                                                                    | 104.195(5)                                                     |
| Volume, Å <sup>3</sup>                  | 1082.7 (3)                                      | 2781.84                                                                                      | 2082.1(2)                                                      |
| D <sub>calcd</sub> , g cm <sup>-3</sup> | 1.332                                           | 1.377                                                                                        | 1.424                                                          |
| Z                                       | 2                                               | 4                                                                                            | 4                                                              |
| F(000)                                  | 448.0                                           | 1188                                                                                         | 912.0                                                          |
| Data Collection                         |                                                 |                                                                                              |                                                                |
| Temperature, K                          | 93                                              | 100                                                                                          | 100                                                            |
| 2θmax, deg                              | 52.8                                            | 52.7                                                                                         | 52.7                                                           |
| Tmin/Tmax                               | 0/1.00                                          | 0.930/0.993                                                                                  | 0.877/0.969                                                    |
| Refinement                              |                                                 |                                                                                              |                                                                |
| No. of Observed Data                    | 5914                                            | 11366                                                                                        | 8505                                                           |
| No. of Parameters                       | 266                                             | 707                                                                                          | 493                                                            |
| R1 <sup>a</sup> , wR2 <sup>b</sup>      | 0.0420, 0.0789                                  | 0.0495, 0.1438                                                                               | 0.0639, 0.1102                                                 |
| Goodness of Fit Indicator               | 0.881                                           | 1.043                                                                                        | 1.031                                                          |

$${}^aR1 = \sum ||F_o| - |F_c|| / \sum |F_o| \quad {}^b wR2 = [ \sum w ((F_o^2 - F_c^2)^2 / \sum w (F_o^2)^2 )^{1/2} \quad w = [ \sigma^2(F_o^2) ]^{-1}$$



**Table S2** Crystallographic Data of **3d-e**, **3a-S**.

|                                         | <b>3d</b>                                          | <b>3e (100K)</b>                                   | <b>3e (173K)</b>                                   |
|-----------------------------------------|----------------------------------------------------|----------------------------------------------------|----------------------------------------------------|
| Crystal data                            |                                                    |                                                    |                                                    |
| Empirical Formula                       | C <sub>23</sub> H <sub>20</sub> S <sub>2</sub> BAs | C <sub>23</sub> H <sub>20</sub> S <sub>2</sub> BAs | C <sub>23</sub> H <sub>20</sub> S <sub>2</sub> BAs |
| Formula Weight                          | 446.24                                             | 446.24                                             | 446.24                                             |
| Crystal Dimension, mm <sup>3</sup>      | 0.30 × 0.25 × 0.21                                 | 1.00 × 0.59 × 0.2                                  | 0.58 × 0.44 × 0.28                                 |
| Crystal System                          | triclinic                                          | monoclinic                                         | triclinic                                          |
| Space Group                             | <i>P</i> -1                                        | <i>P</i> 2 <sub>1</sub> / <i>c</i>                 | <i>P</i> 2 <sub>1</sub> / <i>c</i>                 |
| a, Å                                    | 12.0647(5)                                         | 12.969(2)                                          | 13.0015(8)                                         |
| b, Å                                    | 12.4943(7)                                         | 20.036(2)                                          | 20.047(1)                                          |
| c, Å                                    | 16.6968(8)                                         | 8.407(2)                                           | 8.4791(6)                                          |
| α, deg                                  | 93.998(4)                                          | 90                                                 | 90                                                 |
| β, deg                                  | 110.602(4)                                         | 106.28(2)                                          | 106.771(7)                                         |
| γ, deg                                  | 114.323(5)                                         | 90                                                 | 90                                                 |
| Volume, Å <sup>3</sup>                  | 2077.7(2)                                          | 2096.9(6)                                          | 2116.0(2)                                          |
| D <sub>calcd</sub> , g cm <sup>-3</sup> | 1.427                                              | 1.414                                              | 1.401                                              |
| Z                                       | 4                                                  | 4                                                  | 4                                                  |
| F(000)                                  | 912.0                                              | 912.0                                              | 912.0                                              |
| Data Collection                         |                                                    |                                                    |                                                    |
| Temperature, K                          | 100                                                | 100                                                | 173                                                |
| 2θmax, deg                              | 53.7                                               | 52.7                                               | 52.7                                               |
| Tmin/Tmax                               | 0.916/0.942                                        | 0.779/0.939                                        | 0.402/0.599                                        |
| Refinement                              |                                                    |                                                    |                                                    |
| No. of Observed Data                    | 8492                                               | 4280                                               | 4327                                               |
| No. of Parameters                       | 493                                                | 247                                                | 247                                                |
| R1 <sup>a</sup> , wR2 <sup>b</sup>      | 0.0759, 0.0677                                     | 0.1181, 0.0914                                     | 0.0306, 0.0712                                     |
| Goodness of Fit Indicator               | 1.013                                              | 1.051                                              | 1.031                                              |

$${}^aR1 = \sum ||F_o| - |F_c|| / \sum |F_o| \quad {}^b wR2 = [ \sum w ((F_o^2 - F_c^2)^2 / \sum w (F_o^2)^2 )^{1/2} \quad w = [ \sigma^2(F_o^2) ]^{-1}$$

**Table S3** Crystallographic Data of **3a-AuCl**, **6**, triphenylarsine.

|                                         | <b>3e</b> (200K)                                               | <b>3e</b> (273K)                                  | <b>3e</b> (298K)                                  |
|-----------------------------------------|----------------------------------------------------------------|---------------------------------------------------|---------------------------------------------------|
| Crystal data                            |                                                                |                                                   |                                                   |
| Empirical Formula                       | C <sub>23</sub> H <sub>20</sub> S <sub>2</sub> BA <sub>s</sub> | C <sub>23</sub> H <sub>20</sub> AsBS <sub>2</sub> | C <sub>23</sub> H <sub>20</sub> AsBS <sub>2</sub> |
| Formula Weight                          | 446.24                                                         | 446.24                                            | 446.24                                            |
| Crystal Dimension, mm <sup>3</sup>      | 0.58 × 0.46 × 0.23                                             | 0.52 × 0.44 × 0.22                                | 0.52 × 0.42 × 0.25                                |
| Crystal System                          | monoclinic                                                     | monoclinic                                        | monoclinic                                        |
| Space Group                             | <i>P2</i> <sub>1</sub> / <i>c</i>                              | <i>P2</i> <sub>1</sub> / <i>c</i>                 | <i>P2</i> <sub>1</sub> / <i>c</i>                 |
| a, Å                                    | 13.0268(9)                                                     | 13.013(1)                                         | 13.041(2)                                         |
| b, Å                                    | 20.063(1)                                                      | 20.092(2)                                         | 20.112(2)                                         |
| c, Å                                    | 8.5129(6)                                                      | 8.6030(8)                                         | 8.6242(9)                                         |
| α, deg                                  | 90                                                             | 90                                                | 90                                                |
| β, deg                                  | 106.887(8)                                                     | 107.07(1)                                         | 107.16(1)                                         |
| γ, deg                                  | 90                                                             | 90                                                | 90                                                |
| Volume, Å <sup>3</sup>                  | 2096.9(6)                                                      | 2150.1(4)                                         | 2161(4)                                           |
| D <sub>calcd</sub> , g cm <sup>-3</sup> | 1.392                                                          | 1.379                                             | 1.371                                             |
| Z                                       | 4                                                              | 4                                                 | 4                                                 |
| F(000)                                  | 912.0                                                          | 912.0                                             | 912                                               |
| Data Collection                         |                                                                |                                                   |                                                   |
| Temperature, K                          | 200                                                            | 273                                               | 298                                               |
| 2θmax, deg                              | 52.7                                                           | 52.746                                            | 52.732                                            |
| Tmin/Tmax                               | 0.384/0.658                                                    | 0.413/0.671                                       | 0.414/0.643                                       |
| Refinement                              |                                                                |                                                   |                                                   |
| No. of Observed Data                    | 4353                                                           | 4308                                              | 4409                                              |
| No. of Parameters                       | 247                                                            | 247                                               | 247                                               |
| R1 <sup>a</sup> , wR2 <sup>b</sup>      | 0.00304, 0.0738                                                | 0.0579, 0.1534                                    | 0.0363, 0.0722                                    |
| Goodness of Fit Indicator               | 1.021                                                          | 0.966                                             | 0.968                                             |

$${}^aR1 = \sum ||F_o| - |F_c|| / \sum |F_o| \quad {}^b wR2 = [ \sum w ((F_o^2 - F_c^2)^2 / \sum w (F_o^2)^2 )^{1/2} \quad w = [ \sigma^2(F_o^2) ]^{-1} \quad \textbf{Table.}$$

**Table S4** Crystallographic Data of **3a-AuCl**, **6**, triphenylarsine.

|                                         | <b>3a-S</b> (methanol)                                             | <b>3a-S</b> (hexane)                 | <b>3a-AuCl</b>                                                                                 |
|-----------------------------------------|--------------------------------------------------------------------|--------------------------------------|------------------------------------------------------------------------------------------------|
| Crystal data                            |                                                                    |                                      |                                                                                                |
| Empirical Formula                       | C <sub>27</sub> H <sub>24</sub> AsBS<br>+ 0.5 (CH <sub>3</sub> OH) | C <sub>27</sub> H <sub>24</sub> AsBS | C <sub>55</sub> H <sub>50</sub> As <sub>2</sub> Au <sub>2</sub> B <sub>2</sub> Cl <sub>4</sub> |
| Formula Weight                          | 482.27                                                             | 466.25                               | 1418.14                                                                                        |
| Crystal Dimension, mm <sup>3</sup>      | 0.76 × 0.36 × 0.12                                                 | 0.51 × 0.32 × 0.18                   | 0.37 × 0.28 × 0.17                                                                             |
| Crystal System                          | triclinic                                                          | triclinic                            | triclinic                                                                                      |
| Space Group                             | <i>P</i> -1                                                        | <i>P</i> -1                          | <i>P</i> -1                                                                                    |
| a, Å                                    | 9.3729(6)                                                          | 9.5976(7)                            | 9.0967(3)                                                                                      |
| b, Å                                    | 14.908(1)                                                          | 11.9622(6)                           | 15.1687(7)                                                                                     |
| c, Å                                    | 17.5035(8)                                                         | 20.811(1)                            | 20.2163(5)                                                                                     |
| α, deg                                  | 86.683(4)                                                          | 89.766(4)                            | 68.133(3)                                                                                      |
| β, deg                                  | 81.031(4)                                                          | 78.127(5)                            | 88.064(2)                                                                                      |
| γ, deg                                  | 75.640(5)                                                          | 77.208(5)                            | 83.955(3)                                                                                      |
| Volume, Å <sup>3</sup>                  | 2340.0(2)                                                          | 2278.0(2)                            | 2574.4(2)                                                                                      |
| D <sub>calcd</sub> , g cm <sup>-3</sup> | 1.369                                                              | 1.360                                | 1.829                                                                                          |
| Z                                       | 4                                                                  | 4                                    | 2                                                                                              |
| F(000)                                  | 996.0                                                              | 960.0                                | 1364.0                                                                                         |
| Data Collection                         |                                                                    |                                      |                                                                                                |
| Temperature, K                          | 100                                                                | 100                                  | 100                                                                                            |
| 2θmax, deg                              | 52.7                                                               | 52.742                               | 52.7                                                                                           |
| Tmin/Tmax                               | 0.831/0.955                                                        | 0.546/0.761                          | 0.819/0.891                                                                                    |
| Refinement                              |                                                                    |                                      |                                                                                                |
| No. of Observed Data                    | 10513                                                              | 9271                                 | 10513                                                                                          |
| No. of Parameters                       | 592                                                                | 547                                  | 592                                                                                            |
| R1 <sup>a</sup> , wR2 <sup>b</sup>      | 0.0651, 0.0419                                                     | 0.0579, 0.1534                       | 0.0651, 0.0419                                                                                 |
| Goodness of Fit Indicator               | 0.993                                                              | 1.017                                | 0.993                                                                                          |

$${}^aR1 = \sum ||F_o| - |F_c|| / \sum |F_o| \quad {}^b wR2 = [ \sum w ((F_o^2 - F_c^2)^2 / \sum w (F_o^2)^2 )^{1/2} \quad w = [ \sigma^2(F_o^2) ]^{-1}$$

**Table S5.** Crystallographic Data of **3a-AuCl**, **6**, triphenylarsine.

|                                         | <b>6</b>                             | Triphenylarsine                    |
|-----------------------------------------|--------------------------------------|------------------------------------|
| Crystal data                            |                                      |                                    |
| Empirical Formula                       | C <sub>27</sub> H <sub>24</sub> AsBS | C <sub>18</sub> H <sub>15</sub> As |
| Formula Weight                          | 466.25                               | 306.22                             |
| Crystal Dimension, mm <sup>3</sup>      | 0.51 × 0.32 × 0.18                   | 1.00 × 0.68 × 0.30                 |
| Crystal System                          | triclinic                            | triclinic                          |
| Space Group                             | <i>P</i> -1                          | <i>P</i> -1                        |
| a, Å                                    | 9.5976(7)                            | 10.9773(3)                         |
| b, Å                                    | 11.9622(6)                           | 15.1163(5)                         |
| c, Å                                    | 20.811(1)                            | 17.7332(7)                         |
| α, deg                                  | 89.766(4)                            | 84.333(3)                          |
| β, deg                                  | 78.127(5)                            | 80.134(3)                          |
| γ, deg                                  | 77.208(5)                            | 87.199(3)                          |
| Volume, Å <sup>3</sup>                  | 2278.0(2)                            | 2883.4(2)                          |
| D <sub>calcd</sub> , g cm <sup>-3</sup> | 1.360                                | 1.411                              |
| Z                                       | 4                                    | 8                                  |
| F(000)                                  | 960.0                                | 1248.0                             |
| Data Collection                         |                                      |                                    |
| Temperature, K                          | 100.00                               | 93.15                              |
| 2θmax, deg                              | 52.7                                 | 52.7                               |
| Tmin/Tmax                               | 0.546,0.761                          | 0.711,0.869                        |
| Refinement                              |                                      |                                    |
| No. of Observed Data                    | 9271                                 | 11776                              |
| No. of Parameters                       | 547                                  | 685                                |
| R1 <sup>a</sup> , wR2 <sup>b</sup>      | 0.0579, 0.1534                       | 0.0379, 0.0950                     |
| Goodness of Fit Indicator               | 1.017                                | 1.044                              |

$${}^aR1 = \sum ||Fo| - |Fc|| / \sum |Fo| \quad {}^bwR2 = [ \sum w ((Fo^2 - Fc^2)^2 / \sum w (Fo^2)^2 )^{1/2} \quad w = [ \sigma^2(Fo^2) ]^{-1}$$

**Table S6.** Crystal lattice constant of **3e** (298, 273, 200, 173, 100 K).

|                       | 298 K     | 273 K     | 200K       | 173K       | 100K      |
|-----------------------|-----------|-----------|------------|------------|-----------|
| <i>a</i> -axis (Å)    | 13.041(2) | 13.013(1) | 13.0268(9) | 13.0015(8) | 12.969(2) |
| <i>b</i> -axis (Å)    | 20.112(2) | 20.092(2) | 20.063(1)  | 20.047(1)  | 20.036(2) |
| <i>c</i> -axis (Å)    | 8.6242(9) | 8.6030(8) | 8.5129(6)  | 8.4791(6)  | 8.407(2)  |
| stacking distance (Å) | 3.422(3)  | 3.407(3)  | 3.370(3)   | 3.360(3)   | 3.344(6)  |

**Table S7.** ORTEP drawing and selected bond lengths and angles of **3a**.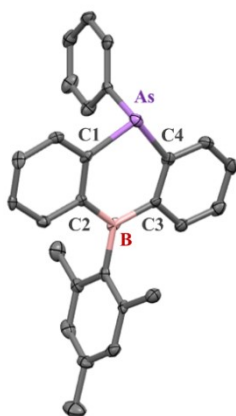

| distances (Å) |          | angles (°)      |          |
|---------------|----------|-----------------|----------|
| As(1)-C(1)    | 1.955(4) | C(4)-As(1)-C(1) | 100.7(2) |
| As(1)-C(4)    | 1.939(5) | As(1)-C(1)-C(2) | 123.6(3) |
| B(1)-C(2)     | 1.552(8) | C(1)-C(2)-B(1)  | 124.9(4) |
| B(1)-C(3)     | 1.556(8) | C(2)-B(1)-C(3)  | 122.5(4) |

---

B(1)-C(3)-C(4) 123.5(4)

C(3)-C(4)-As(1) 124.7(3)

---

**Table S8** ORTEP drawing and selected bond lengths and angles of **3b**.

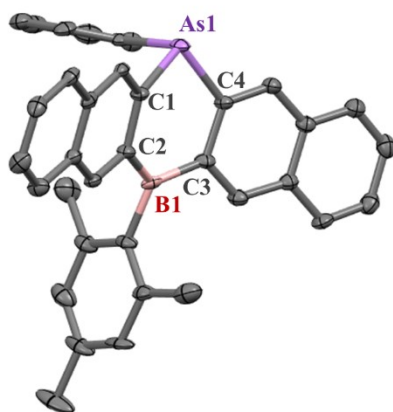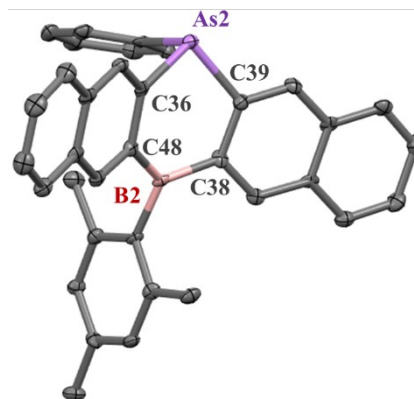

---

distances (Å)

angles (°)

---

As(1)-C(1) 1.944(4)

C(4)-As(1)-C(1) 98.8(1)

As(1)-C(4) 1.933(3)

As(1)-C(1)-C(2) 122.1(2)

B(1)-C(2) 1.537(5)

C(1)-C(2)-B(1) 122.6(3)

|             |          |                   |          |
|-------------|----------|-------------------|----------|
| B(1)-C(3)   | 1.539(7) | C(2)-B(1)-C(3)    | 121.6(3) |
| As(2)-C(36) | 1.948(3) | B(1)-C(3)-C(4)    | 123.4(3) |
| As(2)-C(39) | 1.947(3) | C(3)-C(4)-As(1)   | 121.7(3) |
| B(2)-C(48)  | 1.540(5) | C(39)-As(2)-C(36) | 98.1(1)  |
| B(2)-C(38)  | 1.556(6) | As(2)-C(36)-C(48) | 121.5(2) |
| <hr/>       |          |                   |          |
|             |          | C(36)-C(48)-B(2)  | 123.3(3) |
|             |          | C(48)-B(2)-C(38)  | 120.0(3) |
|             |          | B(2)-C(38)-C(39)  | 124.0(3) |
|             |          | C(38)-C(29)-As(2) | 120.3(2) |
| <hr/>       |          |                   |          |

**Table S9.** ORTEP drawing and selected bond lengths and angles of **3c**.

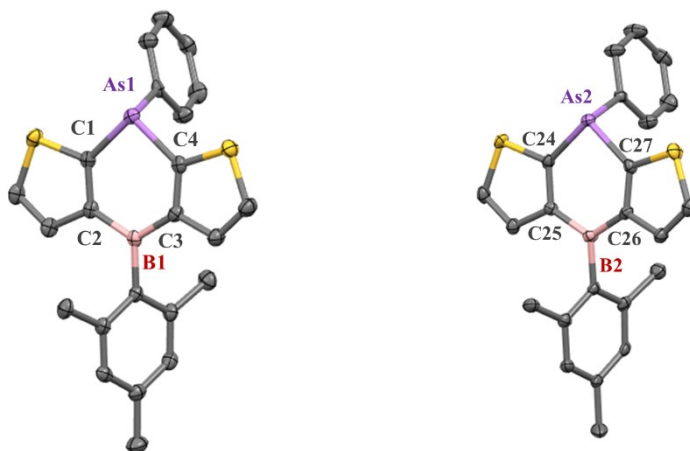

| distances (Å) |          | angles (°)        |          |
|---------------|----------|-------------------|----------|
| As(1)-C(1)    | 1.945(4) | C(4)-As(1)-C(1)   | 94.8(2)  |
| As(1)-C(4)    | 1.942(4) | As(1)-C(1)-C(2)   | 129.1(3) |
| B(1)-C(2)     | 1.547(6) | C(1)-C(2)-B(1)    | 123.4(3) |
| B(1)-C(3)     | 1.535(5) | C(2)-B(1)-C(3)    | 119.7(3) |
| As(2)-C(24)   | 1.948(3) | B(1)-C(3)-C(4)    | 123.8(3) |
| As(2)-C(27)   | 1.947(3) | C(3)-C(4)-As(1)   | 128.5(3) |
| B(2)-C(25)    | 1.540(5) | C(27)-As(2)-C(24) | 94.8(2)  |
| B(2)-C(26)    | 1.556(6) | As(2)-C(24)-C(25) | 129.1(3) |
|               |          | C(24)-C(25)-B(2)  | 123.4(3) |



|                   |          |
|-------------------|----------|
| C(25)–B(2)–C(26)  | 119.7(3) |
| B(2)–C(26)–C(27)  | 123.8(3) |
| C(26)–C(27)–As(2) | 128.5(3) |

**Table S10 .** ORTEP drawing and selected bond lengths and angles of **3d**.

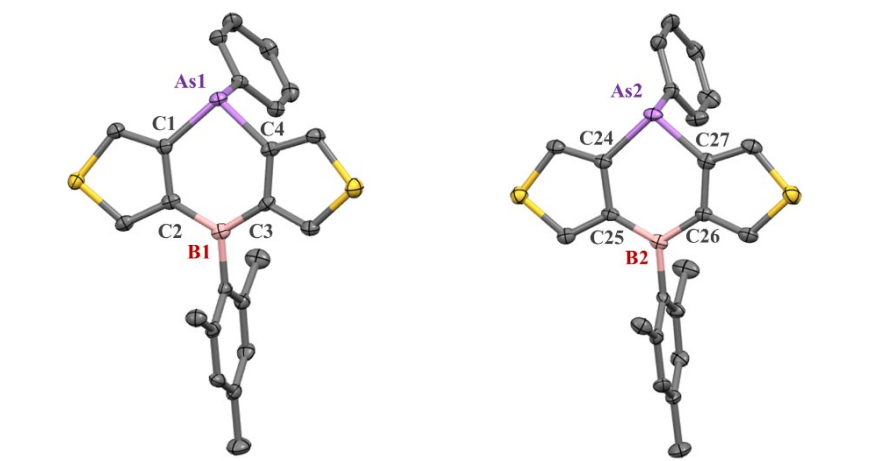

| distances (Å) |          | angles (°)      |          |
|---------------|----------|-----------------|----------|
| As(1)-C(1)    | 1.958(3) | C(4)-As(1)-C(1) | 97.2(1)  |
| As(1)-C(4)    | 1.952(4) | As(1)-C(1)-C(2) | 125.4(3) |
| B(1)-C(2)     | 1.550(5) | C(1)-C(2)-B(1)  | 125.9(3) |
| B(1)-C(3)     | 1.547(5) | C(2)-B(1)-C(3)  | 118.3(3) |
| As(2)-C(24)   | 1.955(3) | B(1)-C(3)-C(4)  | 126.2(3) |

|             |          |                   |          |
|-------------|----------|-------------------|----------|
| As(2)-C(27) | 1.954(4) | C(3)-C(4)-As(1)   | 125.6(3) |
| B(2)-C(25)  | 1.539(5) | C(27)-As(2)-C(24) | 97.4(1)  |
| B(2)-C(26)  | 1.539(4) | As(2)-C(24)-C(25) | 125.5(3) |
|             |          | C(24)-C(25)-B(2)  | 126.4(3) |
|             |          | C(25)-B(2)-C(26)  | 118.7(3) |
|             |          | B(2)-C(26)-C(27)  | 126.1(3) |
|             |          | C(26)-C(27)-As(2) | 125.7(3) |

---

**Table S11.** ORTEP drawing and selected bond lengths and angles of **3e**.

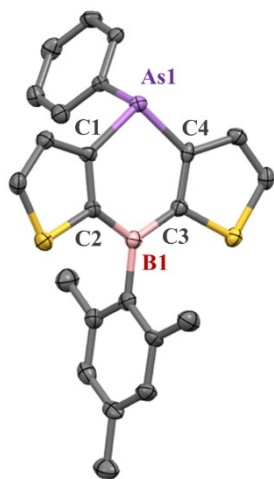

| distances (Å) |          | angles (°)      |         |
|---------------|----------|-----------------|---------|
| As(1)-C(1)    | 1.922(5) | C(4)-As(1)-C(1) | 98.3(2) |

|            |          |                 |          |
|------------|----------|-----------------|----------|
| As(1)-C(4) | 1.941(5) | As(1)-C(1)-C(2) | 123.8(4) |
| B(1)-C(2)  | 1.547(8) | C(1)-C(2)-B(1)  | 129.0(4) |
| B(1)-C(3)  | 1.521(9) | C(2)-B(1)-C(3)  | 115.5(5) |
| <hr/>      |          |                 |          |
|            |          | B(1)-C(3)-C(4)  | 128.5(5) |
|            |          | C(3)-C(4)-As(1) | 124.2(4) |
| <hr/>      |          |                 |          |

**Table S12.** ORTEP drawing and selected bond lengths and angles of **3a-S** from methanol.

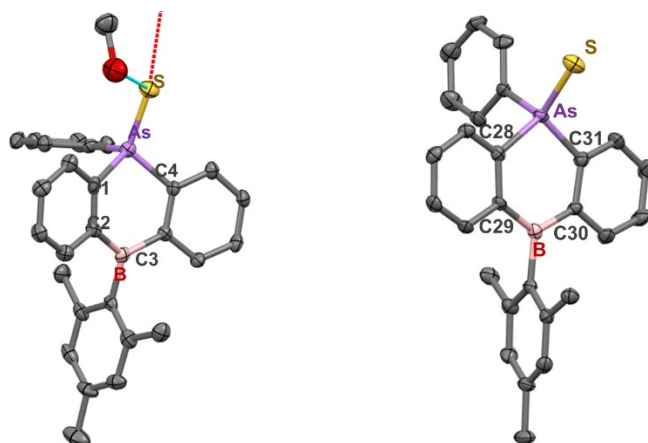

distances (Å)

angles (°)

|            |          |                 |          |
|------------|----------|-----------------|----------|
| As(1)-C(1) | 1.941(5) | C(4)-As(1)-C(1) | 103.6(2) |
| As(1)-C(4) | 1.927(4) | As(1)-C(1)-C(2) | 118.1(3) |
| B(1)-C(2)  | 1.571(8) | C(1)-C(2)-B(1)  | 124.7(4) |
| B(1)-C(3)  | 1.582(8) | C(2)-B(1)-C(3)  | 121.2(4) |

|             |          |                   |          |
|-------------|----------|-------------------|----------|
| As(1)–S(1)  | 2.063(1) | B(1)–C(3)–C(4)    | 123.9(4) |
| As(2)–C(28) | 1.935(5) | C(3)–C(4)–As(1)   | 118.8(3) |
| As(2)–C(31) | 1.922(5) | C(31)–As(2)–C(28) | 105.3(2) |
| B(2)–C(29)  | 1.567(8) | As(2)–C(28)–C(29) | 120.3(3) |
| B(2)–C(30)  | 1.579(8) | C(28)–C(29)–B(2)  | 125.0(4) |
| As(2)–S(2)  | 2.071(1) | C(29)–B(2)–C(30)  | 123.7(4) |
|             |          | B(2)–C(30)–C(31)  | 123.0(4) |
|             |          | C(30)–C(31)–As(2) | 122.4(3) |

**Table S13.** ORTEP drawing and selected bond lengths and angles of **3a-S** from hexane.

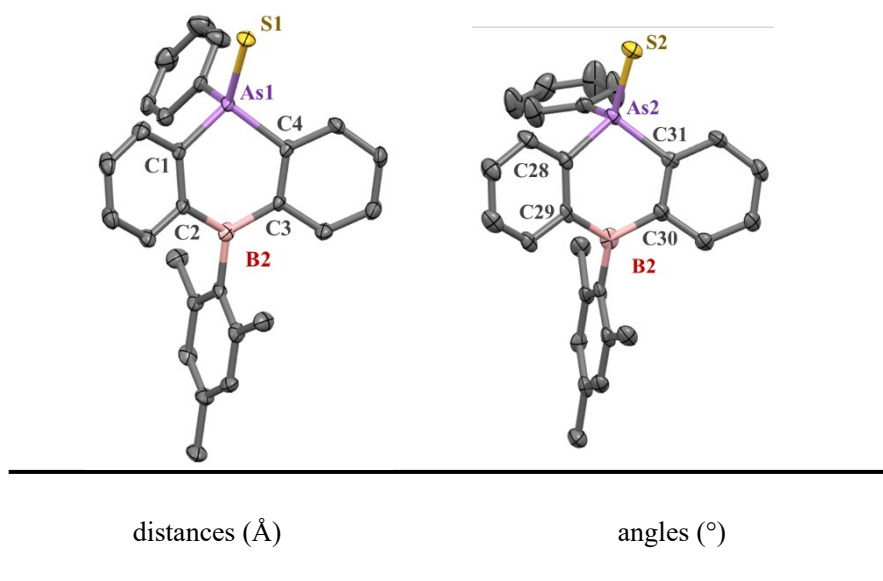

|             |          |                   |          |
|-------------|----------|-------------------|----------|
| As(1)-C(1)  | 1.918(4) | C(4)-As(1)-C(1)   | 102.9(2) |
| As(1)-C(4)  | 1.933(5) | As(1)-C(1)-C(2)   | 120.1(3) |
| B(1)-C(2)   | 1.577(7) | C(1)-C(2)-B(1)    | 124.1(4) |
| B(1)-C(3)   | 1.561(6) | C(2)-B(1)-C(3)    | 121.1(4) |
| As(2)-C(28) | 1.929(5) | B(1)-C(3)-C(4)    | 123.7(4) |
| As(2)-C(31) | 1.929(4) | C(3)-C(4)-As(1)   | 120.0(3) |
| B(2)-C(29)  | 1.588(7) | C(31)-As(2)-C(28) | 102.7(2) |
| B(2)-C(30)  | 1.563(8) | As(2)-C(28)-C(29) | 119.4(3) |
|             |          | C(28)-C(29)-B(2)  | 123.2(4) |
|             |          | C(29)-B(2)-C(30)  | 119.8(5) |
|             |          | B(2)-C(30)-C(31)  | 125.2(4) |
|             |          | C(30)-C(31)-As(2) | 118.4(3) |

**Table S14 .** ORTEP drawing and selected bond lengths and angles of **3a-AuCl**.

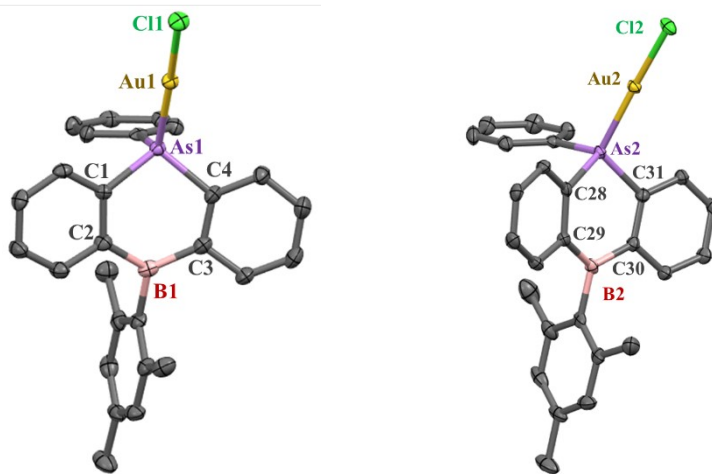

| distances (Å) |          | angles (°)        |          |
|---------------|----------|-------------------|----------|
| As(1)-C(1)    | 1.931(6) | C(4)-As(1)-C(1)   | 103.3(2) |
| As(1)-C(4)    | 1.933(4) | As(1)-C(1)-C(2)   | 119.0(4) |
| B(1)-C(2)     | 1.574(7) | C(1)-C(2)-B(1)    | 124.3(5) |
| B(1)-C(3)     | 1.569(9) | C(2)-B(1)-C(3)    | 121.2(5) |
| As(2)-C(28)   | 1.919(5) | B(1)-C(3)-C(4)    | 124.3(5) |
| As(2)-C(31)   | 1.924(4) | C(3)-C(4)-As(1)   | 119.0(4) |
| B(2)-C(29)    | 1.556(7) | C(31)-As(2)-C(28) | 104.1(2) |
| B(2)-C(30)    | 1.566(7) | As(2)-C(28)-C(29) | 119.4(4) |
|               |          | C(28)-C(29)-B(2)  | 124.1(5) |

C(29)-B(2)-C(30) 122.3(5)

B(2)-C(30)-C(31) 124.1(5)

C(30)-C(31)-As(2) 119.8(4)

---

**Table S15.** ORTEP drawing and selected bond lengths and angles of **5**.

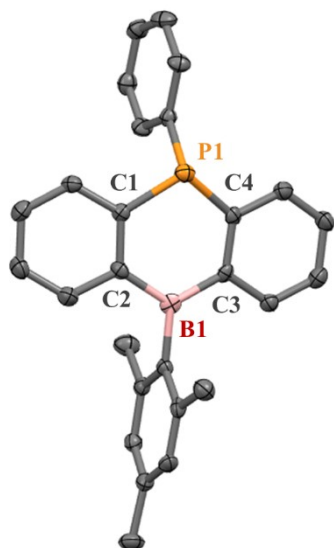

---

| distances (Å) |          | angles (°)     |          |
|---------------|----------|----------------|----------|
| P(1)-C(1)     | 1.811(3) | C(4)-P(1)-C(1) | 103.2(1) |
| P(1)-C(4)     | 1.818(3) | P(1)-C(1)-C(2) | 123.0(2) |
| B(1)-C(2)     | 1.553(5) | C(1)-C(2)-B(1) | 123.1(3) |
| B(1)-C(3)     | 1.553(5) | C(2)-B(1)-C(3) | 119.9(3) |

---

---

B(1)-C(3)-C(4) 123.2(3)

C(3)-C(4)-P(1) 123.0(2)

---

**Table S16.** ORTEP drawing and selected bond lengths and angles of **tripehnyarsine** at **100 K**.

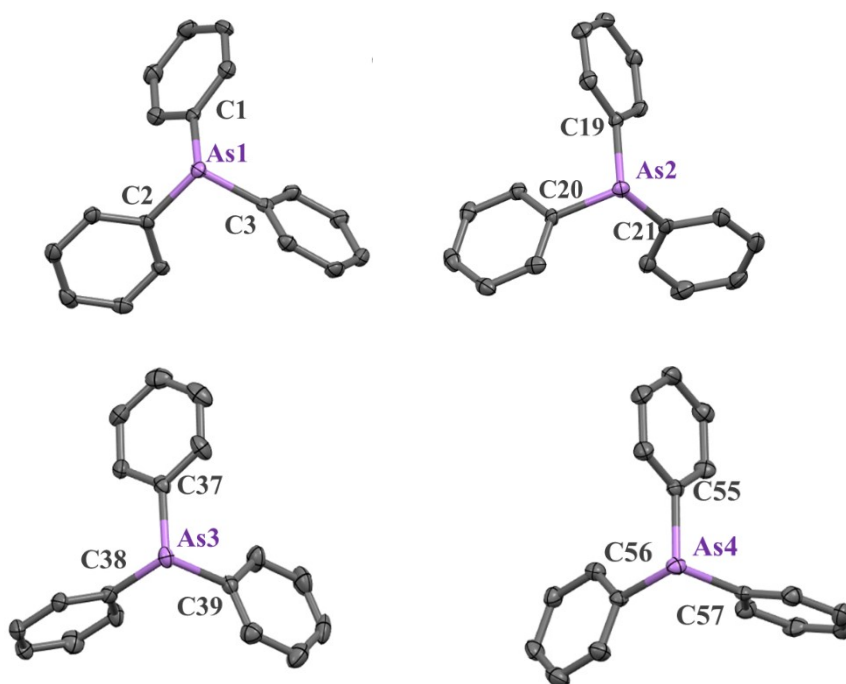

---

distances (Å)

angles (°)

---

As(1)-C(1) 1.951(3)

C(1)-As(1)-C(2) 100.2(1)

As(1)-C(2) 1.955(3)

C(2)-As(1)-C(3) 99.4(1)

As(1)-C(3) 1.948(3)

C(3)-As(1)-B(1) 99.4(1)

As(2)-C(19) 1.946(3)

C(19)-As(2)-C(20) 98.2(1)



|             |          |                   |          |
|-------------|----------|-------------------|----------|
| As(2)-C(20) | 1.953(3) | C(20)-As(2)-C(21) | 99.3(1)  |
| As(2)-C(21) | 1.950(3) | C(21)-As(2)-B(19) | 100.1(1) |
| As(3)-C(37) | 1.954(3) | C(37)-As(3)-C(38) | 100.2(1) |
| As(3)-C(38) | 1.953(3) | C(38)-As(3)-C(39) | 99.6(1)  |
| As(3)-C(39) | 1.955(3) | C(39)-As(3)-B(37) | 99.1(1)  |
| As(4)-C(55) | 1.960(3) | C(55)-As(4)-C(56) | 100.2(1) |
| As(4)-C(56) | 1.952(3) | C(56)-As(4)-C(57) | 99.6(1)  |
| As(4)-C(57) | 1.964(3) | C(57)-As(4)-B(55) | 99.6(1)  |

---

### 3. Photophysical data

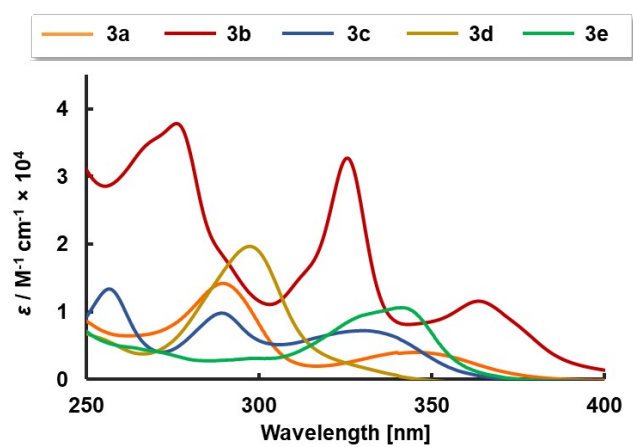

**Figure S1.** UV-vis spectra of **3a-e** in 2-MeTHF ( $1.0 \times 10^{-5}$  mol/L).

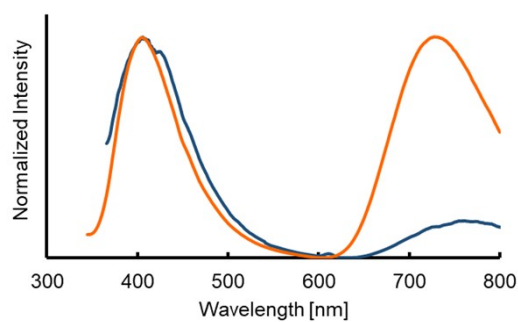

**Figure S2.** Emission spectra of **3a** in 2Me-THF at 77 K, excitation at 346 nm, (orange)  $1.0 \times 10^{-4}$  mol/L, (blue)  $1.0 \times 10^{-5}$  mol/L.

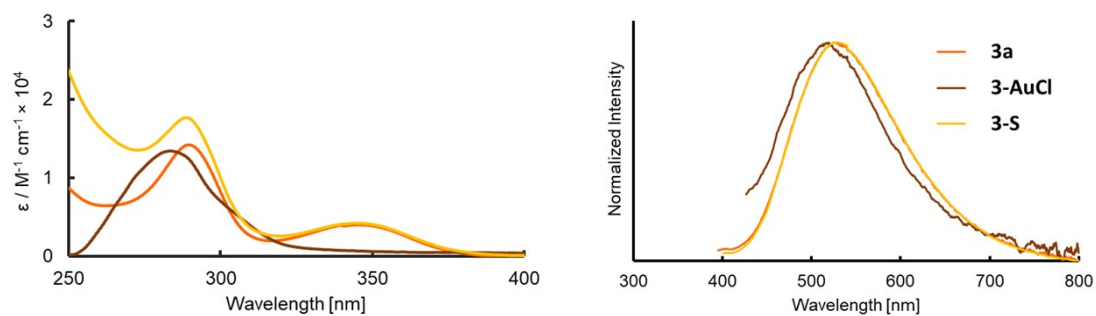

**Figure S3.** (Left) UV-vis absorption and (right) emission spectra of **3a**, **3a-AuCl**, **3a-S** at 298K ( $1.0 \times 10^{-5}$  mol/L in 2Me-THF).

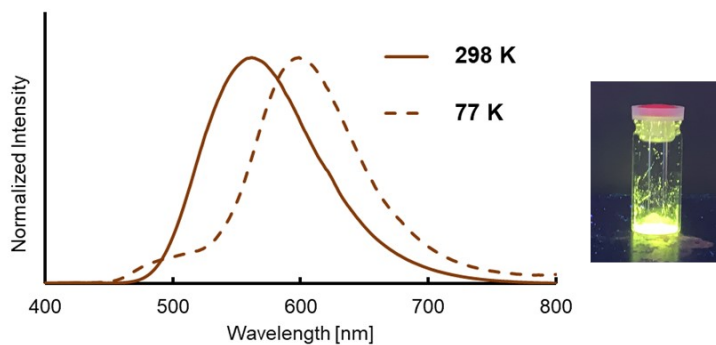

**Figure S4.** Emission spectra of **3a-AuCl** in solid state and photographs of luminescence at 298 K.

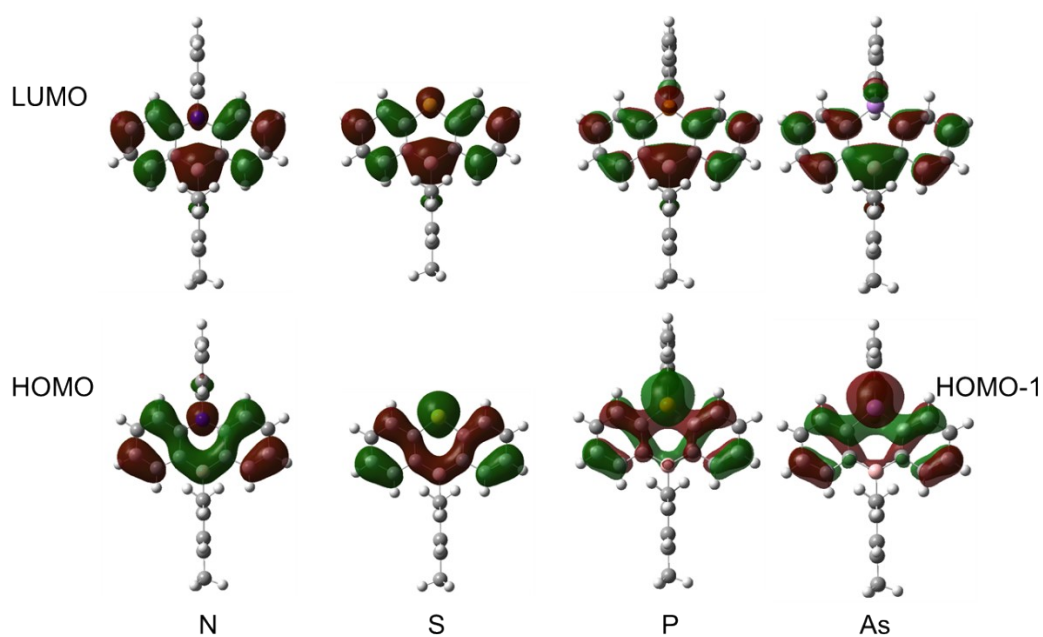

**Figure S5** Frontier orbitals of dibenzoheteroborins (N, S, P, and As).

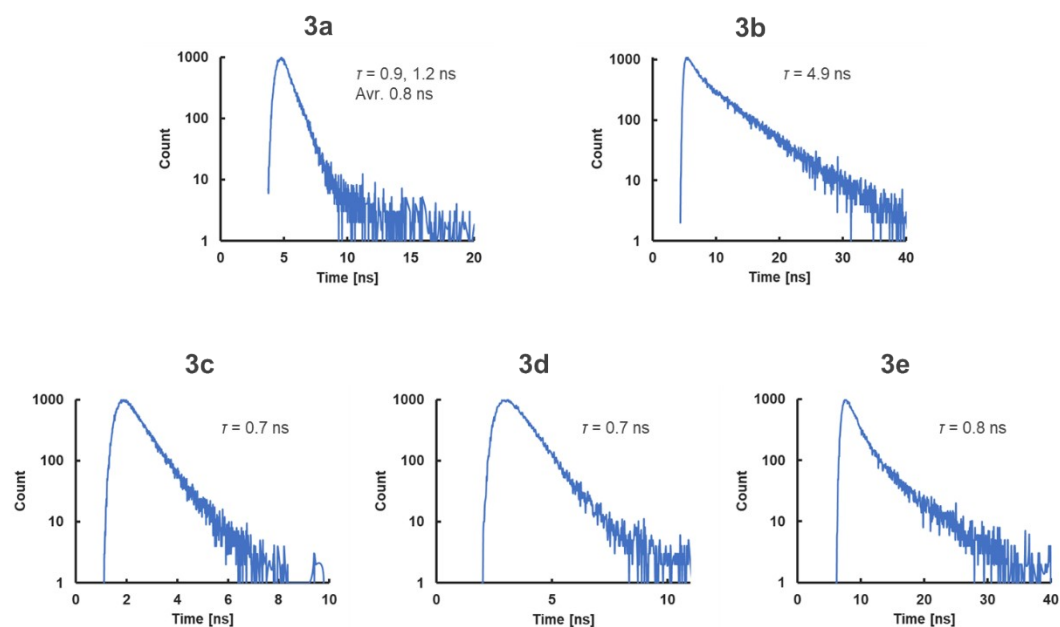

**Figure S6.** The emission decay kinetics of **3a-e** in the solution at 298 K.

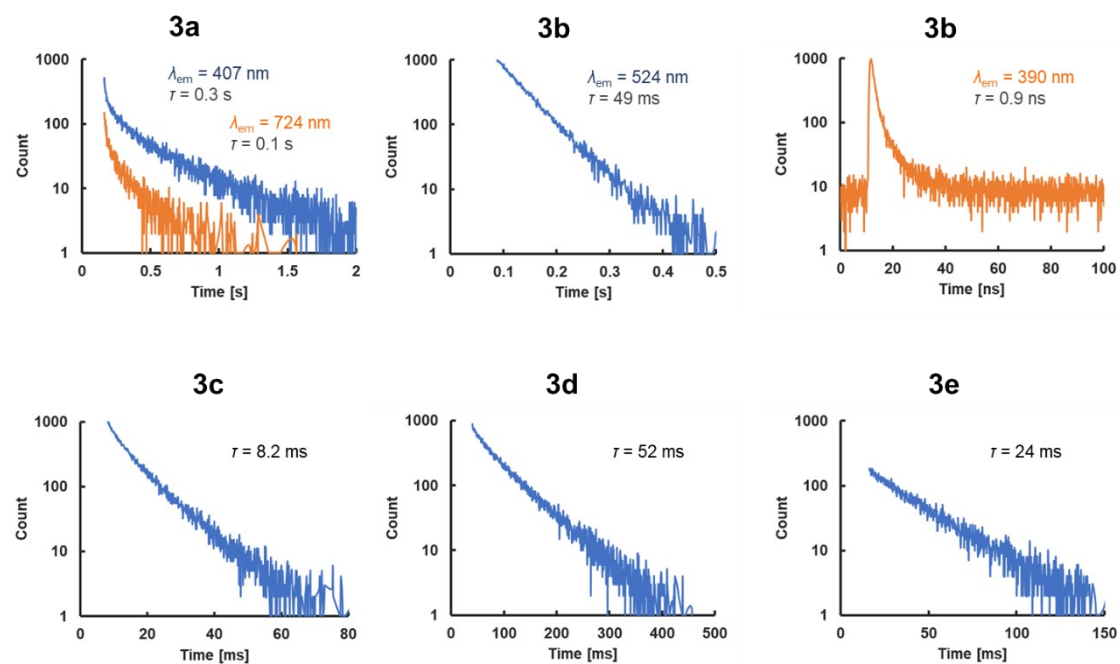

**Figure S7.** The emission decay kinetics of **3a-e** in the solution at 77 K.

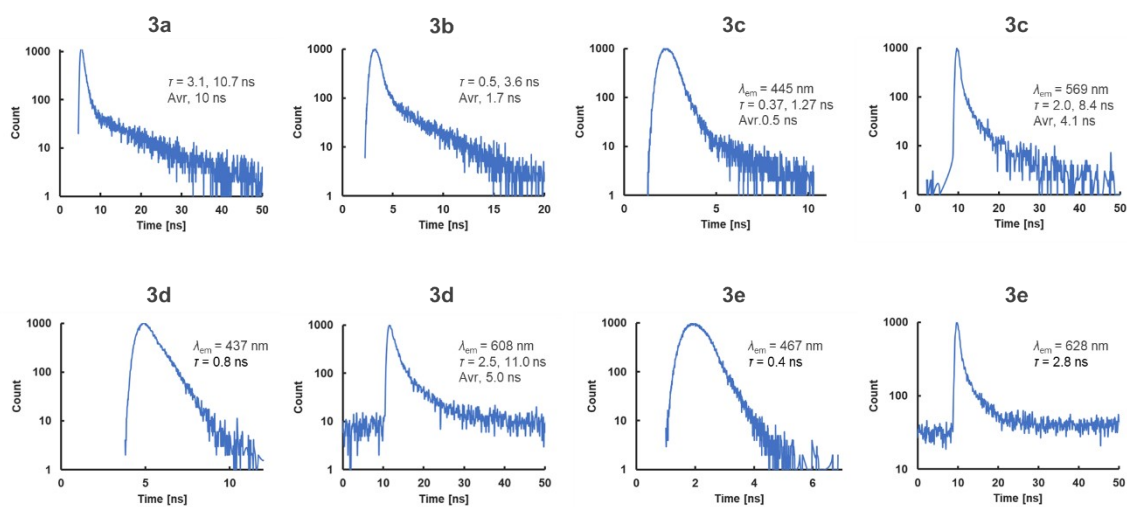

**Figure S8.** The emission decay kinetics of **3a-e** in the solid states at 298 K.

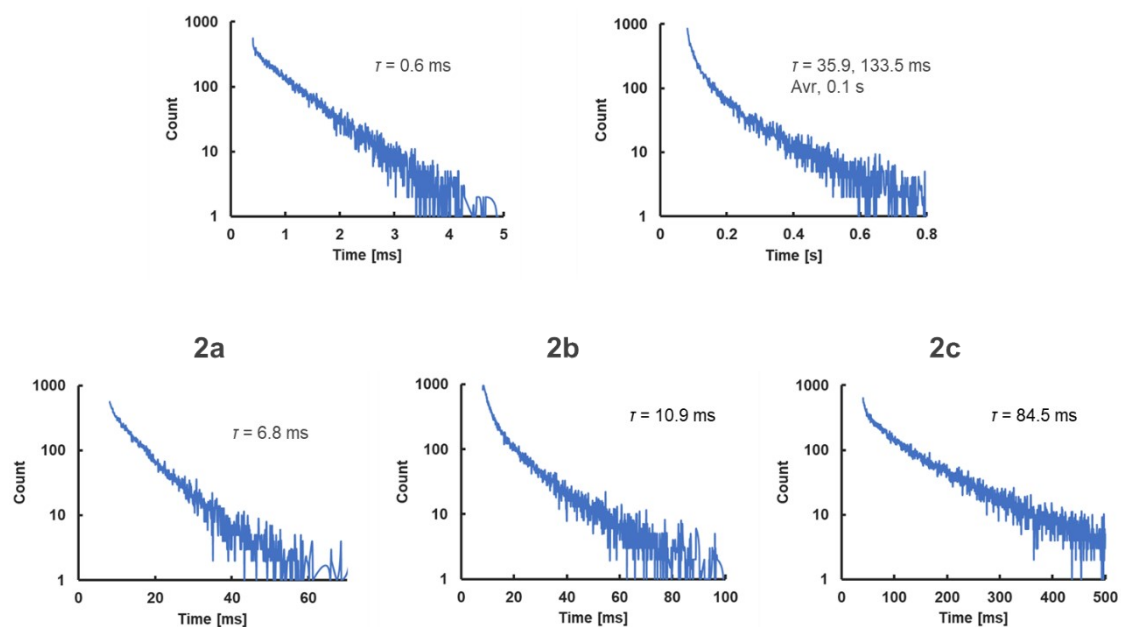

**Figure S9.** The emission decay kinetics of **2a-c** in the solid states at 77 K.

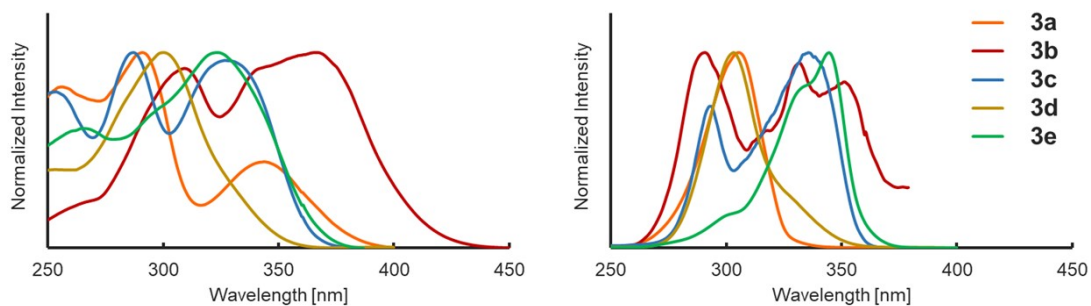

**Figure S10.** Excitation spectra of **3a-e** in solutions at (left) 298 K and (right) 77 K ( $1.0 \times 10^{-5}$  mol/L in 2Me-THF).

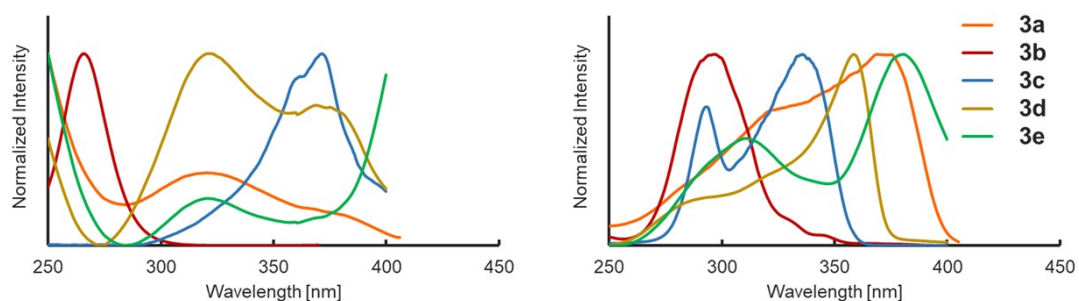

**Figure S11.** Excitation spectra of **3a-e** in solid states at (a) 298 K and (b) 77 K

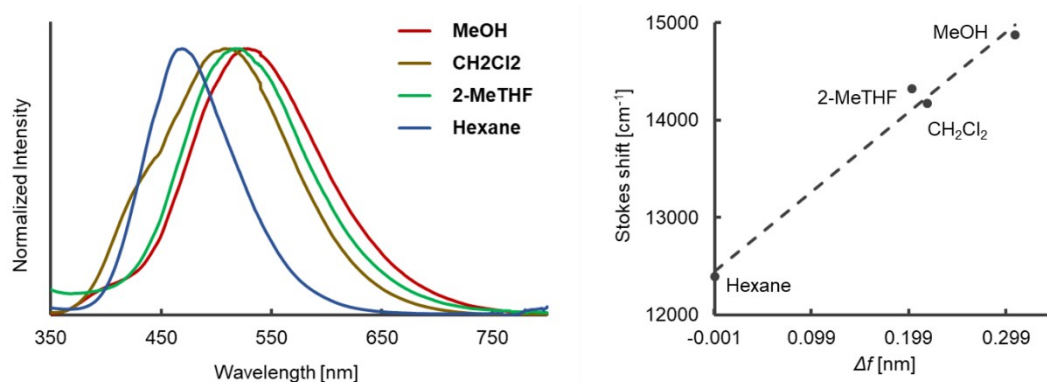

**Figure S12.** Emission spectrum of **3d** in different solvents and Lippert-Mataga-plots ( $\Delta f = [(\epsilon - 1)/(2\epsilon + 1)] - [(n^2 - 1)/(2n^2 + 1)]$ ;  $\epsilon$ : permittivity,  $n$ : refractive index).

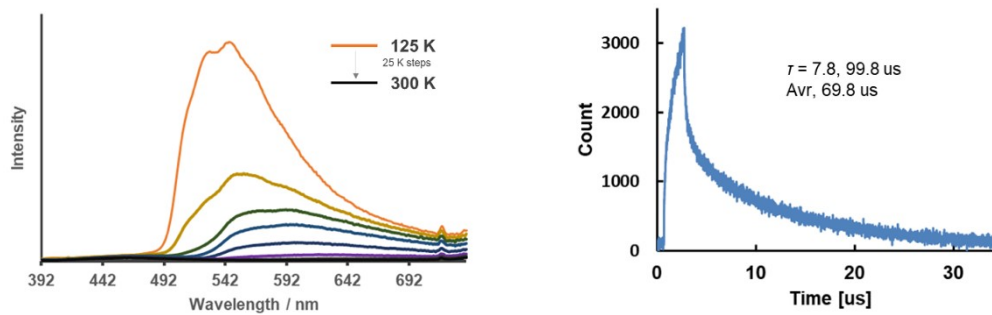

**Figure S13.** The temperature-dependent emission of **3e** in solid states at 125 K to 300 K and the emission decay kinetics of **3e** in the solid state at 150 K (excitation at 595 nm).

#### 4. DFT calculations

##### Cartesian coordinates in the structures optimized by DFT calculations

**Tabel S17. 3a** ( $S_0$ ): B3LYP/6-31G+(d, p) = -3302.104354

| Number | Atom | X        | Y        | Z        |
|--------|------|----------|----------|----------|
| 1      | C    | 0.988025 | 1.50127  | -0.66073 |
| 2      | C    | 1.59062  | 2.76576  | -0.72452 |
| 3      | H    | 2.636992 | 2.855222 | -1.00752 |
| 4      | C    | 0.867179 | 3.918303 | -0.42291 |
| 5      | H    | 1.353185 | 4.889519 | -0.46331 |
| 6      | C    | -0.48412 | 3.818144 | -0.07326 |
| 7      | H    | -1.05893 | 4.711478 | 0.154124 |
| 8      | C    | -1.0898  | 2.566071 | -0.0335  |
| 9      | H    | -2.14201 | 2.495023 | 0.226023 |
| 10     | C    | -0.37961 | 1.37195  | -0.31351 |
| 11     | B    | -1.12221 | -0.0009  | -0.18824 |
| 12     | C    | -0.37819 | -1.37322 | -0.31093 |
| 13     | C    | -1.08724 | -2.56751 | -0.02873 |
| 14     | H    | -2.13956 | -2.49713 | 0.230579 |
| 15     | C    | -0.4803  | -3.81904 | -0.06606 |
| 16     | H    | -1.05426 | -4.7125  | 0.162969 |
| 17     | C    | 0.871095 | -3.91853 | -0.41554 |
| 18     | H    | 1.358059 | -4.88934 | -0.45409 |
| 19     | C    | 1.59341  | -2.76585 | -0.71933 |
| 20     | H    | 2.639862 | -2.85482 | -1.00218 |
| 21     | C    | 0.989561 | -1.50184 | -0.65795 |
| 22     | C    | 3.45782  | 0.001798 | 0.155716 |
| 23     | C    | 4.800502 | 0.002515 | -0.23989 |
| 24     | H    | 5.050993 | 0.00186  | -1.29776 |
| 25     | C    | 5.825588 | 0.004042 | 0.713381 |
| 26     | H    | 6.863598 | 0.004574 | 0.392541 |
| 27     | C    | 5.510806 | 0.004878 | 2.073488 |
| 28     | H    | 6.303824 | 0.006063 | 2.815974 |
| 29     | C    | 4.170774 | 0.004176 | 2.4786   |
| 30     | H    | 3.921153 | 0.004814 | 3.536064 |



|    |    |          |          |          |
|----|----|----------|----------|----------|
| 31 | C  | 3.153932 | 0.002646 | 1.5232   |
| 32 | H  | 2.116869 | 0.002094 | 1.846881 |
| 33 | C  | -2.68115 | -0.00127 | 0.104732 |
| 34 | C  | -3.18114 | -0.00131 | 1.427443 |
| 35 | C  | -4.564   | -0.00528 | 1.653824 |
| 36 | H  | -4.93003 | -0.00913 | 2.679075 |
| 37 | C  | -5.48384 | -0.00667 | 0.600138 |
| 38 | C  | -4.98096 | -0.01055 | -0.70559 |
| 39 | H  | -5.67621 | -0.01861 | -1.54335 |
| 40 | C  | -3.60509 | -0.00646 | -0.9665  |
| 41 | C  | -2.23374 | -0.00156 | 2.61069  |
| 42 | H  | -2.7821  | 0.000421 | 3.557284 |
| 43 | H  | -1.5802  | 0.879148 | 2.603348 |
| 44 | H  | -1.58263 | -0.8841  | 2.605519 |
| 45 | C  | -6.97242 | 0.022592 | 0.862735 |
| 46 | H  | -7.21643 | -0.42615 | 1.830867 |
| 47 | H  | -7.52597 | -0.51921 | 0.088911 |
| 48 | H  | -7.35293 | 1.052163 | 0.874487 |
| 49 | C  | -3.11778 | -0.01162 | -2.40167 |
| 50 | H  | -3.95559 | -0.017   | -3.10505 |
| 51 | H  | -2.4999  | -0.89264 | -2.61415 |
| 52 | H  | -2.50523 | 0.871307 | -2.62161 |
| 53 | As | 2.083907 | -0.00028 | -1.25256 |

**Tabel S18. 3a** ( $S_1$ ): B3LYP/6-31G+(d, p) = -3301.993638

| Number | Atom | X        | Y        | Z        |
|--------|------|----------|----------|----------|
| 1      | C    | 1.049442 | 1.502441 | -0.96777 |
| 2      | C    | 1.585798 | 2.758766 | -1.25485 |
| 3      | H    | 2.611983 | 2.830011 | -1.61072 |
| 4      | C    | 0.84284  | 3.934374 | -1.08984 |
| 5      | H    | 1.284889 | 4.902092 | -1.30723 |
| 6      | C    | -0.47907 | 3.832694 | -0.63481 |
| 7      | H    | -1.07797 | 4.729511 | -0.49384 |
| 8      | C    | -1.03436 | 2.585661 | -0.37905 |
| 9      | H    | -2.06916 | 2.554223 | -0.04347 |
| 10     | C    | -0.31026 | 1.36104  | -0.53739 |

|    |   |          |          |          |
|----|---|----------|----------|----------|
| 11 | B | -0.96499 | -0.00404 | -0.29186 |
| 12 | C | -0.30498 | -1.3708  | -0.51501 |
| 13 | C | -1.02615 | -2.59485 | -0.34053 |
| 14 | H | -2.06135 | -2.56154 | -0.00617 |
| 15 | C | -0.46716 | -3.84389 | -0.57794 |
| 16 | H | -1.06369 | -4.74025 | -0.42465 |
| 17 | C | 0.854862 | -3.94817 | -1.032   |
| 18 | H | 1.299483 | -4.9176  | -1.23616 |
| 19 | C | 1.594459 | -2.773   | -1.21392 |
| 20 | H | 2.620555 | -2.84632 | -1.56963 |
| 21 | C | 1.054906 | -1.51432 | -0.94342 |
| 22 | C | 3.219198 | 0.007838 | 0.467872 |
| 23 | C | 4.618299 | 0.016605 | 0.435435 |
| 24 | H | 5.13137  | 0.016522 | -0.52356 |
| 25 | C | 5.368003 | 0.025994 | 1.617745 |
| 26 | H | 6.453882 | 0.033277 | 1.571551 |
| 27 | C | 4.718124 | 0.024899 | 2.853363 |
| 28 | H | 5.295299 | 0.031438 | 3.77405  |
| 29 | C | 3.319108 | 0.014752 | 2.900173 |
| 30 | H | 2.808123 | 0.013493 | 3.859779 |
| 31 | C | 2.581407 | 0.007029 | 1.715066 |
| 32 | H | 1.496305 | -0.00086 | 1.756959 |
| 33 | C | -2.50713 | -0.00615 | 0.15582  |
| 34 | C | -2.88769 | 0.011129 | 1.560604 |
| 35 | C | -4.22048 | 0.016039 | 1.914651 |
| 36 | H | -4.50423 | 0.029872 | 2.963261 |
| 37 | C | -5.24737 | 0.001926 | 0.932315 |
| 38 | C | -4.89047 | -0.02278 | -0.44217 |
| 39 | H | -5.68265 | -0.03982 | -1.18549 |
| 40 | C | -3.57026 | -0.02801 | -0.84074 |
| 41 | C | -1.81388 | 0.02631  | 2.60996  |
| 42 | H | -2.23965 | 0.031717 | 3.616544 |
| 43 | H | -1.1744  | 0.906306 | 2.487558 |
| 44 | H | -1.16209 | -0.84647 | 2.501847 |
| 45 | C | -6.68385 | 0.044258 | 1.339029 |
| 46 | H | -6.83813 | -0.37659 | 2.335867 |

|    |    |          |          |          |
|----|----|----------|----------|----------|
| 47 | H  | -7.32409 | -0.47384 | 0.619692 |
| 48 | H  | -7.02302 | 1.090661 | 1.373005 |
| 49 | C  | -3.20575 | -0.0587  | -2.2963  |
| 50 | H  | -4.0956  | -0.07588 | -2.93056 |
| 51 | H  | -2.59015 | -0.93666 | -2.51637 |
| 52 | H  | -2.59698 | 0.813656 | -2.55458 |
| 53 | As | 2.253964 | -0.00646 | -1.26109 |

**Tabel S19. 3b** ( $S_0$ ): B3LYP/6-31G+(d, p) = -3609.407121

| Number | Atom | X        | Y        | Z        |
|--------|------|----------|----------|----------|
| 1      | C    | -1.50333 | 1.028928 | -0.71212 |
| 2      | C    | -2.74981 | 1.607688 | -0.8464  |
| 3      | H    | -2.83936 | 2.649613 | -1.14986 |
| 4      | C    | -2.55314 | -1.06698 | -0.11307 |
| 5      | H    | -2.48686 | -2.11744 | 0.158613 |
| 6      | C    | -1.37412 | -0.35532 | -0.34605 |
| 7      | B    | -0.00552 | -1.09588 | -0.18258 |
| 8      | C    | 1.370654 | -0.369   | -0.34394 |
| 9      | C    | 2.542198 | -1.09259 | -0.10998 |
| 10     | H    | 2.465175 | -2.14214 | 0.162445 |
| 11     | C    | 2.766699 | 1.579157 | -0.846   |
| 12     | H    | 2.867064 | 2.619801 | -1.15047 |
| 13     | C    | 1.514268 | 1.013446 | -0.71144 |
| 14     | C    | 0.017095 | 3.365653 | 0.38311  |
| 15     | C    | 0.022223 | 4.744512 | 0.142854 |
| 16     | H    | 0.023176 | 5.112894 | -0.88008 |
| 17     | C    | 0.026206 | 5.655644 | 1.205577 |
| 18     | H    | 0.030166 | 6.723304 | 1.003881 |
| 19     | C    | 0.025114 | 5.189625 | 2.521459 |
| 20     | H    | 0.028215 | 5.893347 | 3.349081 |
| 21     | C    | 0.020052 | 3.812202 | 2.77172  |
| 22     | H    | 0.01922  | 3.444552 | 3.794222 |
| 23     | C    | 0.016069 | 2.909428 | 1.707487 |
| 24     | H    | 0.012196 | 1.842591 | 1.912887 |
| 25     | C    | -0.01362 | -2.64562 | 0.160545 |
| 26     | C    | -0.0143  | -3.10171 | 1.498941 |

|    |    |          |          |          |
|----|----|----------|----------|----------|
| 27 | C  | -0.01766 | -4.47639 | 1.771444 |
| 28 | H  | -0.01427 | -4.80803 | 2.80833  |
| 29 | C  | -0.02301 | -5.43081 | 0.749054 |
| 30 | C  | -0.01848 | -4.9717  | -0.57285 |
| 31 | H  | -0.01566 | -5.69443 | -1.38708 |
| 32 | C  | -0.01537 | -3.60518 | -0.87951 |
| 33 | C  | -0.00696 | -2.11563 | 2.650119 |
| 34 | H  | -0.01227 | -2.63205 | 3.614484 |
| 35 | H  | -0.8832  | -1.45677 | 2.620859 |
| 36 | H  | 0.88011  | -1.47131 | 2.622688 |
| 37 | C  | -0.05908 | -6.90976 | 1.060787 |
| 38 | H  | 0.369424 | -7.1211  | 2.04556  |
| 39 | H  | 0.498021 | -7.48918 | 0.317279 |
| 40 | H  | -1.08894 | -7.28963 | 1.063823 |
| 41 | C  | -0.00973 | -3.16643 | -2.33036 |
| 42 | H  | -0.012   | -4.02733 | -3.00525 |
| 43 | H  | 0.874611 | -2.56168 | -2.56497 |
| 44 | H  | -0.88779 | -2.55412 | -2.56891 |
| 45 | As | 0.011523 | 2.171272 | -1.18416 |
| 46 | C  | -3.84152 | -0.48912 | -0.21132 |
| 47 | C  | -3.94511 | 0.889406 | -0.58419 |
| 48 | C  | -5.23467 | 1.478828 | -0.68945 |
| 49 | H  | -5.31352 | 2.525578 | -0.97134 |
| 50 | C  | -6.36825 | 0.733617 | -0.44447 |
| 51 | H  | -7.3487  | 1.193408 | -0.5301  |
| 52 | C  | -6.26722 | -0.63347 | -0.07515 |
| 53 | H  | -7.17011 | -1.20593 | 0.11594  |
| 54 | C  | -5.03099 | -1.23089 | 0.036869 |
| 55 | H  | -4.94622 | -2.27745 | 0.318003 |
| 56 | C  | 3.836501 | -0.52819 | -0.20855 |
| 57 | C  | 5.018171 | -1.28206 | 0.040487 |
| 58 | H  | 4.922479 | -2.32744 | 0.322507 |
| 59 | C  | 3.954448 | 0.848791 | -0.58287 |
| 60 | C  | 5.250046 | 1.424852 | -0.688   |
| 61 | H  | 5.339788 | 2.470495 | -0.97073 |
| 62 | C  | 6.26053  | -0.69752 | -0.07165 |

|    |   |          |          |          |
|----|---|----------|----------|----------|
| 63 | H | 7.157396 | -1.27913 | 0.120118 |
| 64 | C | 6.375783 | 0.668136 | -0.44212 |
| 65 | H | 7.360957 | 1.117711 | -0.52778 |

**Tabel S20. 3b** ( $S_1$ ): B3LYP/6-31G+(d, p) = -3609.312352

| Number | Atom | X        | Y        | Z        |
|--------|------|----------|----------|----------|
| 1      | C    | -0.91804 | -1.54421 | -0.3927  |
| 2      | C    | -1.5646  | -2.75828 | -0.33829 |
| 3      | H    | -2.63556 | -2.82789 | -0.51649 |
| 4      | C    | 1.191373 | -2.5626  | 0.068751 |
| 5      | H    | 2.261281 | -2.50922 | 0.251287 |
| 6      | C    | 0.503128 | -1.3728  | -0.21057 |
| 7      | B    | 1.232327 | 0.004624 | -0.21984 |
| 8      | C    | 0.492826 | 1.37666  | -0.21006 |
| 9      | C    | 1.172356 | 2.571344 | 0.069492 |
| 10     | H    | 2.242675 | 2.525861 | 0.251798 |
| 11     | C    | -1.58507 | 2.746885 | -0.33707 |
| 12     | H    | -2.65653 | 2.808669 | -0.51514 |
| 13     | C    | -0.92957 | 1.537594 | -0.39199 |
| 14     | C    | -3.66224 | -0.01358 | -0.11411 |
| 15     | C    | -4.80027 | -0.01739 | -0.92714 |
| 16     | H    | -4.70013 | -0.01665 | -2.0087  |
| 17     | C    | -6.07198 | -0.02218 | -0.34625 |
| 18     | H    | -6.9548  | -0.02515 | -0.97845 |
| 19     | C    | -6.20229 | -0.02308 | 1.044456 |
| 20     | H    | -7.18982 | -0.02677 | 1.496227 |
| 21     | C    | -5.06359 | -0.01925 | 1.857577 |
| 22     | H    | -5.16408 | -0.01995 | 2.938809 |
| 23     | C    | -3.79306 | -0.01452 | 1.280619 |
| 24     | H    | -2.9122  | -0.01156 | 1.915151 |
| 25     | C    | 2.820458 | 0.010483 | -0.07929 |
| 26     | C    | 3.441426 | 0.012961 | 1.193379 |
| 27     | C    | 4.839563 | 0.021808 | 1.300542 |
| 28     | H    | 5.293807 | 0.027556 | 2.290297 |
| 29     | C    | 5.664502 | 0.025607 | 0.171469 |
| 30     | C    | 5.048797 | 0.026976 | -1.08486 |

|    |    |          |          |          |
|----|----|----------|----------|----------|
| 31 | H  | 5.668891 | 0.036857 | -1.98009 |
| 32 | C  | 3.654452 | 0.018372 | -1.22331 |
| 33 | C  | 2.606119 | 0.010397 | 2.458654 |
| 34 | H  | 3.240047 | 0.012613 | 3.35094  |
| 35 | H  | 1.957552 | -0.87222 | 2.50969  |
| 36 | H  | 1.951136 | 0.888282 | 2.509722 |
| 37 | C  | 7.170899 | 0.00117  | 0.302694 |
| 38 | H  | 7.495809 | 0.428168 | 1.257027 |
| 39 | H  | 7.652332 | 0.566566 | -0.50232 |
| 40 | H  | 7.558477 | -1.02496 | 0.255274 |
| 41 | C  | 3.052078 | 0.021561 | -2.61402 |
| 42 | H  | 3.831065 | 0.028401 | -3.38308 |
| 43 | H  | 2.4152   | 0.899993 | -2.77244 |
| 44 | H  | 2.423862 | -0.86179 | -2.77958 |
| 45 | As | -1.90534 | -0.00683 | -0.92834 |
| 46 | C  | 0.572648 | -3.84298 | 0.150649 |
| 47 | C  | -0.84262 | -3.95866 | -0.04846 |
| 48 | C  | -1.46436 | -5.22191 | 0.026514 |
| 49 | H  | -2.53848 | -5.29194 | -0.12803 |
| 50 | C  | -0.71922 | -6.36435 | 0.296714 |
| 51 | H  | -1.20526 | -7.33318 | 0.356959 |
| 52 | C  | 0.671842 | -6.25762 | 0.49653  |
| 53 | H  | 1.253613 | -7.15019 | 0.709584 |
| 54 | C  | 1.306165 | -5.02539 | 0.425628 |
| 55 | H  | 2.379357 | -4.95258 | 0.5801   |
| 56 | C  | 0.544211 | 3.847125 | 0.15183  |
| 57 | C  | 1.269104 | 5.034772 | 0.426995 |
| 58 | H  | 2.342836 | 4.969785 | 0.581184 |
| 59 | C  | -0.8719  | 3.952409 | -0.04695 |
| 60 | C  | -1.50291 | 5.211063 | 0.028568 |
| 61 | H  | -2.57756 | 5.273251 | -0.1257  |
| 62 | C  | 0.625758 | 6.262285 | 0.498357 |
| 63 | H  | 1.201004 | 7.159057 | 0.711501 |
| 64 | C  | -0.76611 | 6.358829 | 0.298904 |
| 65 | H  | -1.25924 | 7.324053 | 0.35953  |

---

**Tabel S21. 3c** ( $S_0$ ): B3LYP/6-31G+(d, p) = -3943.617077

| Number | Atom | X        | Y        | Z        |
|--------|------|----------|----------|----------|
| 1      | C    | -0.89453 | -1.44252 | -0.63937 |
| 2      | C    | 0.461708 | -1.34426 | -0.34315 |
| 3      | B    | 1.223918 | 0.000405 | -0.19294 |
| 4      | C    | 0.461106 | 1.344456 | -0.34615 |
| 5      | C    | -0.89526 | 1.441674 | -0.6422  |
| 6      | As   | -2.06605 | -0.00121 | -1.20775 |
| 7      | C    | 1.041727 | 2.652285 | -0.15589 |
| 8      | C    | 0.160498 | 3.679945 | -0.32532 |
| 9      | S    | -1.42563 | 3.092791 | -0.73412 |
| 10     | S    | -1.42438 | -3.09398 | -0.72784 |
| 11     | C    | 0.161875 | -3.67981 | -0.3176  |
| 12     | C    | 1.04272  | -2.6515  | -0.15013 |
| 13     | C    | -3.37211 | -0.00069 | 0.261033 |
| 14     | C    | 3.230571 | 0.008081 | 1.470872 |
| 15     | C    | 4.60603  | 0.012195 | 1.735956 |
| 16     | C    | 5.554773 | 0.006988 | 0.707818 |
| 17     | C    | 5.089897 | 0.003855 | -0.61207 |
| 18     | C    | 3.721729 | -0.00071 | -0.91137 |
| 19     | C    | 2.770153 | 0.000942 | 0.134601 |
| 20     | C    | 3.269264 | -0.00294 | -2.35806 |
| 21     | C    | 2.246241 | 0.015741 | 2.623476 |
| 22     | C    | 7.034967 | -0.02165 | 1.014239 |
| 23     | C    | -4.7318  | -0.00752 | -0.06846 |
| 24     | C    | -5.70546 | -0.00803 | 0.936947 |
| 25     | C    | -5.32007 | -0.0017  | 2.278741 |
| 26     | C    | -3.96121 | 0.0052   | 2.615171 |
| 27     | C    | -2.99513 | 0.005682 | 1.609049 |
| 28     | H    | 2.085174 | 2.799144 | 0.100941 |
| 29     | H    | 0.333298 | 4.743415 | -0.22749 |
| 30     | H    | 0.334994 | -4.74302 | -0.2176  |
| 31     | H    | 2.086141 | -2.79736 | 0.10732  |
| 32     | H    | 4.943634 | 0.021661 | 2.770904 |
| 33     | H    | 5.808683 | 0.006719 | -1.42973 |
| 34     | H    | 4.123356 | -0.00402 | -3.04161 |

|    |   |          |          |          |
|----|---|----------|----------|----------|
| 35 | H | 2.658618 | -0.8849  | -2.58695 |
| 36 | H | 2.658189 | 0.877908 | -2.59015 |
| 37 | H | 1.593169 | -0.86517 | 2.600381 |
| 38 | H | 2.764376 | 0.019167 | 3.586995 |
| 39 | H | 1.596514 | 0.898873 | 2.592131 |
| 40 | H | 7.253004 | 0.451179 | 1.977137 |
| 41 | H | 7.409828 | -1.05217 | 1.064145 |
| 42 | H | 7.613449 | 0.49735  | 0.243103 |
| 43 | H | -5.03664 | -0.01235 | -1.11197 |
| 44 | H | -6.75849 | -0.01333 | 0.670351 |
| 45 | H | -6.07387 | -0.00206 | 3.060913 |
| 46 | H | -3.65732 | 0.01018  | 3.658167 |
| 47 | H | -1.9421  | 0.011104 | 1.87571  |

**Tabel S22. 3c** ( $S_1$ ): B3LYP/6-31G+(d, p) = -3943.501671

| Number | Atom | X        | Y        | Z        |
|--------|------|----------|----------|----------|
| 1      | C    | 0.913772 | 1.423565 | -0.76239 |
| 2      | C    | -0.44149 | 1.325734 | -0.38959 |
| 3      | B    | -1.15548 | -0.00482 | -0.17535 |
| 4      | C    | -0.43668 | -1.333   | -0.38872 |
| 5      | C    | 0.919488 | -1.42641 | -0.75977 |
| 6      | As   | 2.142517 | 0.000453 | -1.20209 |
| 7      | C    | -1.01418 | -2.65947 | -0.28319 |
| 8      | C    | -0.16301 | -3.6803  | -0.58473 |
| 9      | S    | 1.416366 | -3.08838 | -1.0179  |
| 10     | S    | 1.4048   | 3.086902 | -1.02229 |
| 11     | C    | -0.17633 | 3.673787 | -0.58868 |
| 12     | C    | -1.02368 | 2.650264 | -0.28549 |
| 13     | C    | 3.312376 | 0.004272 | 0.421327 |
| 14     | C    | -3.16224 | -0.01004 | 1.577236 |
| 15     | C    | -4.51139 | -0.00748 | 1.861563 |
| 16     | C    | -5.48713 | -0.0041  | 0.827383 |
| 17     | C    | -5.06129 | -0.00689 | -0.52706 |
| 18     | C    | -3.7221  | -0.00892 | -0.8573  |
| 19     | C    | -2.71059 | -0.00823 | 0.193565 |
| 20     | C    | -3.28187 | -0.01261 | -2.29207 |



|    |   |          |          |          |
|----|---|----------|----------|----------|
| 21 | C | -2.14297 | -0.01575 | 2.679793 |
| 22 | C | -6.94151 | 0.035293 | 1.163994 |
| 23 | C | 4.697693 | 0.025397 | 0.234965 |
| 24 | C | 5.569373 | 0.029747 | 1.330727 |
| 25 | C | 5.053669 | 0.012291 | 2.628371 |
| 26 | C | 3.667597 | -0.00961 | 2.825973 |
| 27 | C | 2.807833 | -0.01343 | 1.726059 |
| 28 | H | -2.04523 | -2.84193 | 0.00732  |
| 29 | H | -0.36189 | -4.74391 | -0.5744  |
| 30 | H | -0.37895 | 4.7367   | -0.57944 |
| 31 | H | -2.05517 | 2.829278 | 0.005632 |
| 32 | H | -4.8499  | -0.0097  | 2.89391  |
| 33 | H | -5.81487 | -0.00867 | -1.30963 |
| 34 | H | -4.13686 | -0.01541 | -2.97277 |
| 35 | H | -2.65651 | 0.861292 | -2.50072 |
| 36 | H | -2.6543  | -0.88601 | -2.49603 |
| 37 | H | -1.48684 | 0.856304 | 2.596818 |
| 38 | H | -2.61912 | -0.01492 | 3.663613 |
| 39 | H | -1.49446 | -0.89336 | 2.594907 |
| 40 | H | -7.1475  | -0.42354 | 2.134487 |
| 41 | H | -7.27327 | 1.082912 | 1.22574  |
| 42 | H | -7.54999 | -0.44663 | 0.394073 |
| 43 | H | 5.103248 | 0.038497 | -0.7749  |
| 44 | H | 6.64438  | 0.046379 | 1.170658 |
| 45 | H | 5.726037 | 0.015331 | 3.482115 |
| 46 | H | 3.262782 | -0.02367 | 3.834918 |
| 47 | H | 1.732102 | -0.0309  | 1.880755 |

**Tabel S23. 3d** ( $S_0$ ): B3LYP/6-31G+(d, p) = -3943.615879

| Number | Atom | X        | Y        | Z        |
|--------|------|----------|----------|----------|
| 1      | C    | -1.08496 | 1.468463 | -0.95071 |
| 2      | C    | 0.303238 | 1.332402 | -0.55686 |
| 3      | B    | 1.058078 | 4.8E-06  | -0.31293 |
| 4      | C    | 0.303229 | -1.33238 | -0.55691 |
| 5      | C    | -1.08497 | -1.46841 | -0.95078 |
| 6      | As   | -2.3318  | 3.59E-05 | -1.26274 |

|    |   |          |          |          |
|----|---|----------|----------|----------|
| 7  | C | 0.900882 | -2.57592 | -0.44039 |
| 8  | S | -0.16077 | -3.87721 | -0.82329 |
| 9  | C | -1.46049 | -2.76764 | -1.15374 |
| 10 | C | -1.46047 | 2.7677   | -1.15365 |
| 11 | S | -0.16074 | 3.877248 | -0.82314 |
| 12 | C | 0.9009   | 2.575933 | -0.44028 |
| 13 | C | -3.25395 | 2.5E-06  | 0.476916 |
| 14 | C | 2.895702 | -8.5E-05 | 1.531191 |
| 15 | C | 4.236146 | -0.00011 | 1.931928 |
| 16 | C | 5.283942 | -0.00006 | 1.002501 |
| 17 | C | 4.952713 | 2.2E-06  | -0.35529 |
| 18 | C | 3.619699 | 3.07E-05 | -0.79141 |
| 19 | C | 2.569253 | -1.1E-05 | 0.153294 |
| 20 | C | 3.320693 | 9.71E-05 | -2.27757 |
| 21 | C | 1.802398 | -0.00015 | 2.581434 |
| 22 | C | 6.724494 | 2.06E-05 | 1.461598 |
| 23 | C | -4.65351 | -9E-06   | 0.473587 |
| 24 | C | -5.37453 | -3.4E-05 | 1.673447 |
| 25 | C | -4.69527 | -5E-05   | 2.892998 |
| 26 | C | -3.29568 | -4.2E-05 | 2.909277 |
| 27 | C | -2.58631 | -1.6E-05 | 1.70776  |
| 28 | H | 1.926366 | -2.78015 | -0.15946 |
| 29 | H | -2.42399 | -3.15179 | -1.46316 |
| 30 | H | -2.42396 | 3.15187  | -1.46306 |
| 31 | H | 1.926386 | 2.780141 | -0.15935 |
| 32 | H | 4.468591 | -0.00019 | 2.99567  |
| 33 | H | 5.749414 | 0.000024 | -1.09681 |
| 34 | H | 2.737233 | -0.88053 | -2.5714  |
| 35 | H | 4.242034 | 0.000132 | -2.86724 |
| 36 | H | 2.737221 | 0.880742 | -2.57132 |
| 37 | H | 1.157099 | 0.8819   | 2.490174 |
| 38 | H | 1.157062 | -0.88216 | 2.490033 |
| 39 | H | 2.223714 | -0.00024 | 3.590936 |
| 40 | H | 7.413183 | -0.00103 | 0.611598 |
| 41 | H | 6.948277 | -0.88137 | 2.074333 |
| 42 | H | 6.948749 | 0.882576 | 2.072491 |

|    |   |          |          |          |
|----|---|----------|----------|----------|
| 43 | H | -5.18964 | 1.7E-06  | -0.47261 |
| 44 | H | -6.46077 | -4.1E-05 | 1.652319 |
| 45 | H | -5.25108 | -7E-05   | 3.82642  |
| 46 | H | -2.7613  | -5.5E-05 | 3.85532  |
| 47 | H | -1.50024 | -9.5E-06 | 1.732888 |

**Tabel S24. 3d** (S<sub>1</sub>): B3LYP/6-31G+(d, p) = -3943.499605

| Number | Atom | X        | Y        | Z        |
|--------|------|----------|----------|----------|
| 1      | C    | -1.06884 | 1.471982 | -0.94884 |
| 2      | C    | 0.316646 | 1.337874 | -0.53844 |
| 3      | B    | 1.030833 | -7.2E-06 | -0.29367 |
| 4      | C    | 0.316631 | -1.33788 | -0.53846 |
| 5      | C    | -1.06885 | -1.47196 | -0.94886 |
| 6      | As   | -2.30437 | 1.88E-05 | -1.26561 |
| 7      | C    | 0.89301  | -2.61148 | -0.41922 |
| 8      | S    | -0.18705 | -3.91172 | -0.82812 |
| 9      | C    | -1.4547  | -2.76504 | -1.16553 |
| 10     | C    | -1.45467 | 2.765065 | -1.16549 |
| 11     | S    | -0.187   | 3.91173  | -0.82808 |
| 12     | C    | 0.893041 | 2.611468 | -0.41919 |
| 13     | C    | -3.23803 | 1.06E-05 | 0.471903 |
| 14     | C    | 2.89666  | -5.2E-05 | 1.57416  |
| 15     | C    | 4.224313 | -6.8E-05 | 1.950176 |
| 16     | C    | 5.269496 | -4.3E-05 | 0.979902 |
| 17     | C    | 4.942119 | -1.9E-05 | -0.39726 |
| 18     | C    | 3.62214  | -3.9E-06 | -0.81207 |
| 19     | C    | 2.55056  | -0.00002 | 0.168172 |
| 20     | C    | 3.295911 | 2.42E-05 | -2.27559 |
| 21     | C    | 1.81843  | -7.4E-05 | 2.621014 |
| 22     | C    | 6.696026 | 4.76E-05 | 1.42601  |
| 23     | C    | -4.63758 | 1.35E-05 | 0.468128 |
| 24     | C    | -5.36231 | 8.4E-06  | 1.666374 |
| 25     | C    | -4.68634 | 1.6E-06  | 2.887665 |
| 26     | C    | -3.28658 | -6E-07   | 2.905249 |
| 27     | C    | -2.57451 | 3.5E-06  | 1.704629 |
| 28     | H    | 1.907085 | -2.84903 | -0.12864 |

|    |   |          |          |          |
|----|---|----------|----------|----------|
| 29 | H | -2.42188 | -3.12694 | -1.48977 |
| 30 | H | -2.42184 | 3.126983 | -1.48974 |
| 31 | H | 1.907121 | 2.848999 | -0.12862 |
| 32 | H | 4.479091 | -0.0001  | 3.00657  |
| 33 | H | 5.736909 | -1.6E-05 | -1.13743 |
| 34 | H | 2.693654 | -0.87766 | -2.53164 |
| 35 | H | 4.202869 | 4.16E-05 | -2.88701 |
| 36 | H | 2.693644 | 0.877716 | -2.53161 |
| 37 | H | 1.176504 | 0.879108 | 2.509708 |
| 38 | H | 1.176465 | -0.87922 | 2.509635 |
| 39 | H | 2.24478  | -0.00012 | 3.628556 |
| 40 | H | 7.387188 | -0.00099 | 0.580302 |
| 41 | H | 6.902312 | -0.8798  | 2.047984 |
| 42 | H | 6.902724 | 0.881165 | 2.046064 |
| 43 | H | -5.17111 | 1.92E-05 | -0.4796  |
| 44 | H | -6.44881 | 1.03E-05 | 1.643057 |
| 45 | H | -5.24435 | -1.8E-06 | 3.820133 |
| 46 | H | -2.75458 | -5.9E-06 | 3.853114 |
| 47 | H | -1.48813 | 1.4E-06  | 1.725096 |

**Tabel S25. 3e (S<sub>0</sub>): B3LYP/6-31G+(d, p) = -3943.628696**

| Number | Atom | X        | Y        | Z        |
|--------|------|----------|----------|----------|
| 1      | C    | -0.26512 | 1.310549 | -0.42055 |
| 2      | C    | 1.080314 | 1.468705 | -0.7395  |
| 3      | C    | 1.078399 | -1.46924 | -0.73887 |
| 4      | C    | -0.26701 | -1.30916 | -0.42079 |
| 5      | B    | -1.05808 | 0.001229 | -0.23851 |
| 6      | C    | 1.4922   | -2.82984 | -0.814   |
| 7      | C    | 0.475323 | -3.7053  | -0.51862 |
| 8      | S    | -1.00499 | -2.8879  | -0.18151 |
| 9      | S    | -1.00057 | 2.890346 | -0.18044 |
| 10     | C    | 0.480739 | 3.705617 | -0.51831 |
| 11     | C    | 1.496232 | 2.828689 | -0.8141  |
| 12     | C    | -2.59552 | 0.001823 | 0.124451 |
| 13     | C    | -3.56977 | 0.003565 | -0.90153 |
| 14     | C    | -4.93036 | 0.007621 | -0.57169 |

|    |    |          |          |          |
|----|----|----------|----------|----------|
| 15 | C  | -5.36556 | 0.006949 | 0.757938 |
| 16 | C  | -4.39524 | 0.008874 | 1.765407 |
| 17 | C  | -3.0262  | 0.005151 | 1.47152  |
| 18 | As | 2.23324  | -0.00108 | -1.26668 |
| 19 | C  | 3.51981  | -0.0018  | 0.22039  |
| 20 | C  | 4.881104 | -0.00563 | -0.10477 |
| 21 | C  | 5.853648 | -0.00672 | 0.901509 |
| 22 | C  | 5.466446 | -0.00404 | 2.242843 |
| 23 | C  | 4.106799 | -0.00022 | 2.575926 |
| 24 | C  | 3.140899 | 0.000863 | 1.568522 |
| 25 | C  | -3.15329 | 0.005003 | -2.3587  |
| 26 | C  | -2.02056 | 0.008839 | 2.605239 |
| 27 | C  | -6.83846 | -0.02279 | 1.096553 |
| 28 | H  | 2.498221 | -3.14957 | -1.06384 |
| 29 | H  | 0.524391 | -4.78626 | -0.49118 |
| 30 | H  | 0.531393 | 4.786503 | -0.49069 |
| 31 | H  | 2.502634 | 3.146925 | -1.0643  |
| 32 | H  | -5.66719 | 0.013059 | -1.37293 |
| 33 | H  | -4.71067 | 0.015349 | 2.807197 |
| 34 | H  | 5.187267 | -0.00766 | -1.14788 |
| 35 | H  | 6.907199 | -0.00966 | 0.636442 |
| 36 | H  | 6.218466 | -0.00488 | 3.026743 |
| 37 | H  | 3.801393 | 0.001885 | 3.618582 |
| 38 | H  | 2.087679 | 0.003839 | 1.834592 |
| 39 | H  | -2.55087 | -0.87749 | -2.60559 |
| 40 | H  | -4.02509 | 0.006996 | -3.01939 |
| 41 | H  | -2.54805 | 0.886071 | -2.60376 |
| 42 | H  | -2.52186 | 0.009107 | 3.577526 |
| 43 | H  | -1.36918 | -0.87251 | 2.567469 |
| 44 | H  | -1.37236 | 0.892435 | 2.565218 |
| 45 | H  | -7.43434 | 0.492391 | 0.336254 |
| 46 | H  | -7.20942 | -1.05407 | 1.158112 |
| 47 | H  | -7.03618 | 0.452912 | 2.062396 |

**Tabel S26. 3e** ( $S_1$ ): B3LYP/6-31G+(d, p) = -3943.519127

| Number | Atom | X | Y | Z |
|--------|------|---|---|---|
|--------|------|---|---|---|

---

|    |    |          |          |          |
|----|----|----------|----------|----------|
| 1  | C  | 0.232939 | -1.30783 | -0.49487 |
| 2  | C  | -1.10375 | -1.46526 | -0.90541 |
| 3  | C  | -1.09575 | 1.464791 | -0.90743 |
| 4  | C  | 0.240725 | 1.300292 | -0.49884 |
| 5  | B  | 0.96928  | -0.00552 | -0.25397 |
| 6  | C  | -1.46625 | 2.819566 | -1.12567 |
| 7  | C  | -0.47081 | 3.724187 | -0.85363 |
| 8  | S  | 0.986696 | 2.910351 | -0.3467  |
| 9  | S  | 0.968886 | -2.92188 | -0.33718 |
| 10 | C  | -0.49308 | -3.72831 | -0.84296 |
| 11 | C  | -1.48269 | -2.81848 | -1.11889 |
| 12 | C  | 2.510283 | -0.00974 | 0.174028 |
| 13 | C  | 3.558148 | -0.01188 | -0.83712 |
| 14 | C  | 4.882507 | -0.01046 | -0.4536  |
| 15 | C  | 5.253894 | -0.00653 | 0.916792 |
| 16 | C  | 4.238076 | -0.0087  | 1.911583 |
| 17 | C  | 2.90186  | -0.01064 | 1.573744 |
| 18 | As | -2.31001 | 0.002729 | -1.28891 |
| 19 | C  | -3.40662 | 0.006781 | 0.371011 |
| 20 | C  | -4.79788 | 0.015087 | 0.226359 |
| 21 | C  | -5.63769 | 0.018674 | 1.346459 |
| 22 | C  | -5.08504 | 0.013793 | 2.628687 |
| 23 | C  | -3.69375 | 0.005237 | 2.785459 |
| 24 | C  | -2.86452 | 0.001823 | 1.661928 |
| 25 | C  | 3.172451 | -0.0163  | -2.28725 |
| 26 | C  | 1.836915 | -0.0144  | 2.63211  |
| 27 | C  | 6.693153 | 0.033877 | 1.310476 |
| 28 | H  | -2.45282 | 3.123059 | -1.46272 |
| 29 | H  | -0.5012  | 4.802568 | -0.92314 |
| 30 | H  | -0.53004 | -4.80671 | -0.90891 |
| 31 | H  | -2.47083 | -3.11689 | -1.45584 |
| 32 | H  | 5.666524 | -0.01342 | -1.20565 |
| 33 | H  | 4.534842 | -0.01023 | 2.95668  |
| 34 | H  | -5.23276 | 0.018741 | -0.77086 |
| 35 | H  | -6.71689 | 0.025162 | 1.217008 |
| 36 | H  | -5.73201 | 0.016468 | 3.501744 |

|    |   |          |          |          |
|----|---|----------|----------|----------|
| 37 | H | -3.25996 | 0.00125  | 3.782303 |
| 38 | H | -1.7853  | -0.00501 | 1.787656 |
| 39 | H | 2.558568 | 0.859926 | -2.51954 |
| 40 | H | 4.052787 | -0.01909 | -2.93454 |
| 41 | H | 2.556872 | -0.89273 | -2.51422 |
| 42 | H | 2.271408 | -0.0135  | 3.634839 |
| 43 | H | 1.188611 | 0.860763 | 2.522461 |
| 44 | H | 1.194023 | -0.89354 | 2.521937 |
| 45 | H | 7.332317 | -0.44774 | 0.565667 |
| 46 | H | 7.02063  | 1.082391 | 1.383843 |
| 47 | H | 6.861096 | -0.42299 | 2.289164 |

---

## 5. NMR Spectra

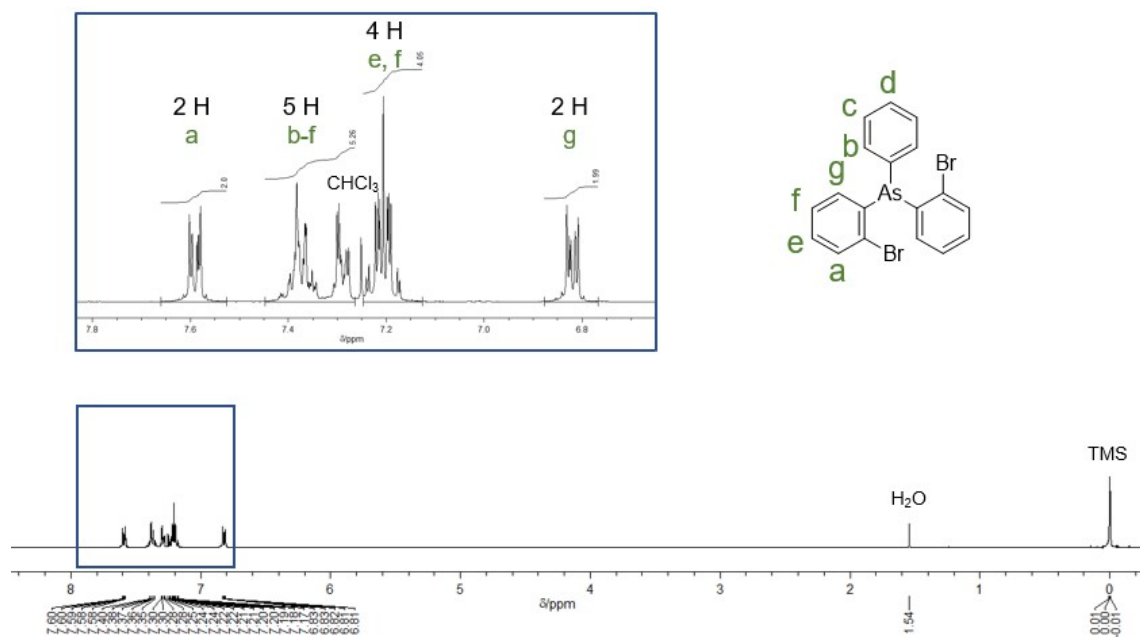

Figure S14.  $^1\text{H-NMR}$  spectrum (400 MHz) of **2a** in  $\text{CDCl}_3$

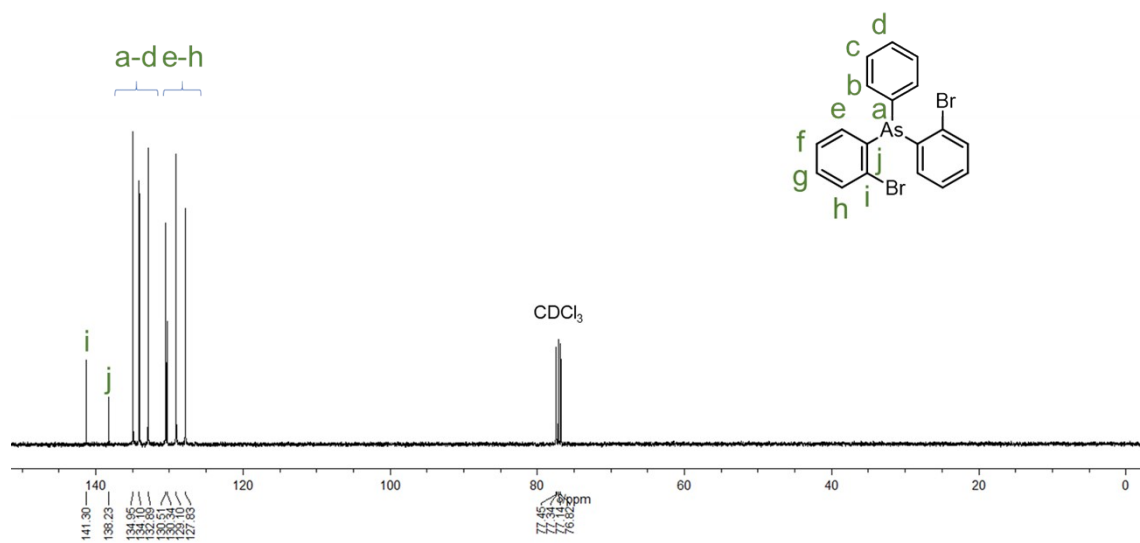

Figure S15.  $^{13}\text{C-NMR}$  spectrum (100 MHz) of **2a** in  $\text{CDCl}_3$ .



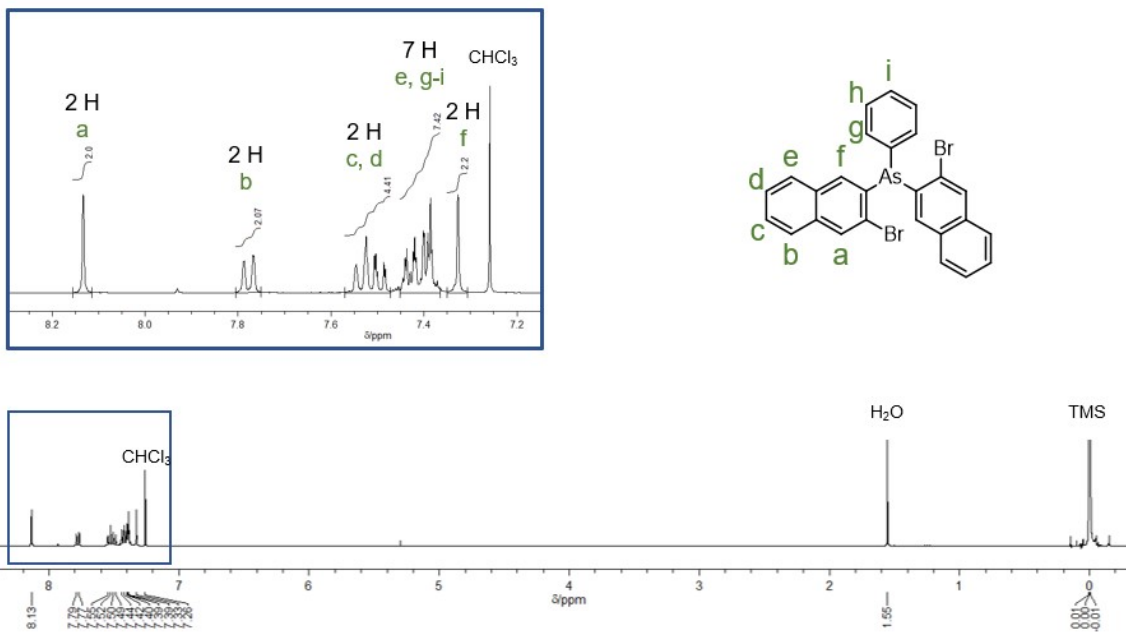

**Figure S16.**  $^1\text{H-NMR}$  spectrum (400 MHz) of **2b** in  $\text{CDCl}_3$ .

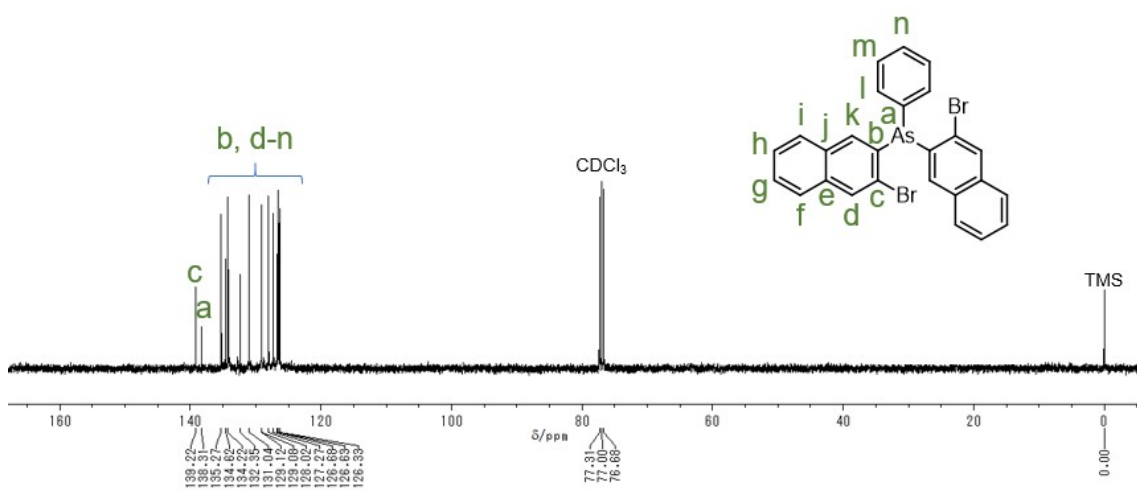

**Figure S17.**  $^{13}\text{C-NMR}$  spectrum (100 MHz) of **2b** in  $\text{CDCl}_3$ .

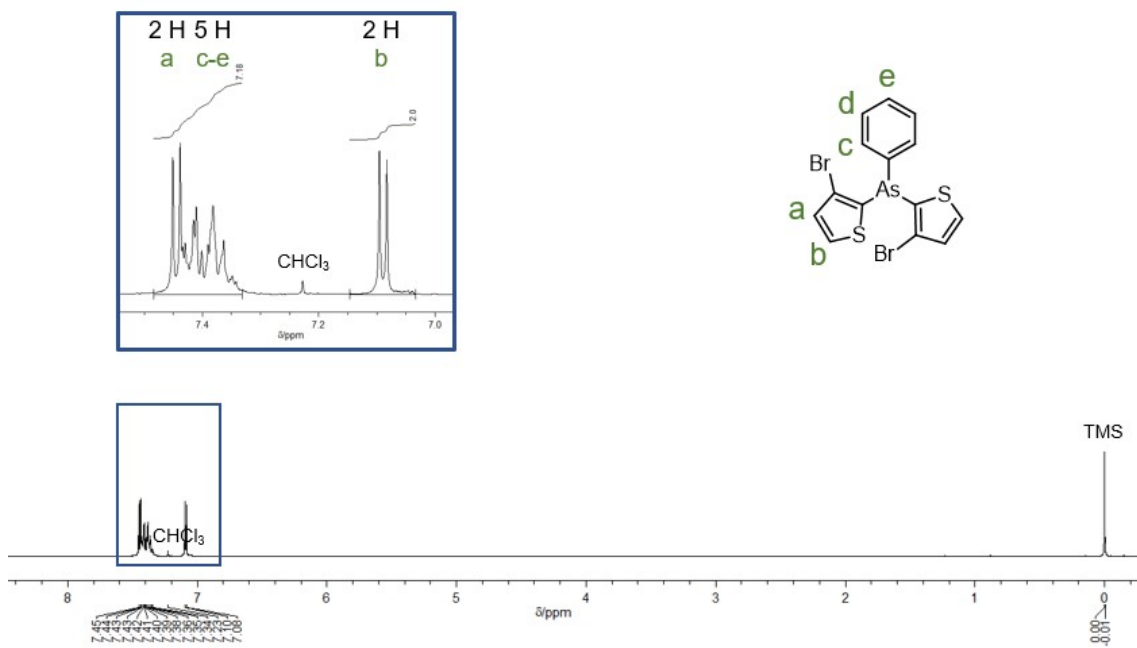

**Figure S18.**  $^1\text{H-NMR}$  spectrum (400 MHz) of **2c** in  $\text{CDCl}_3$ .

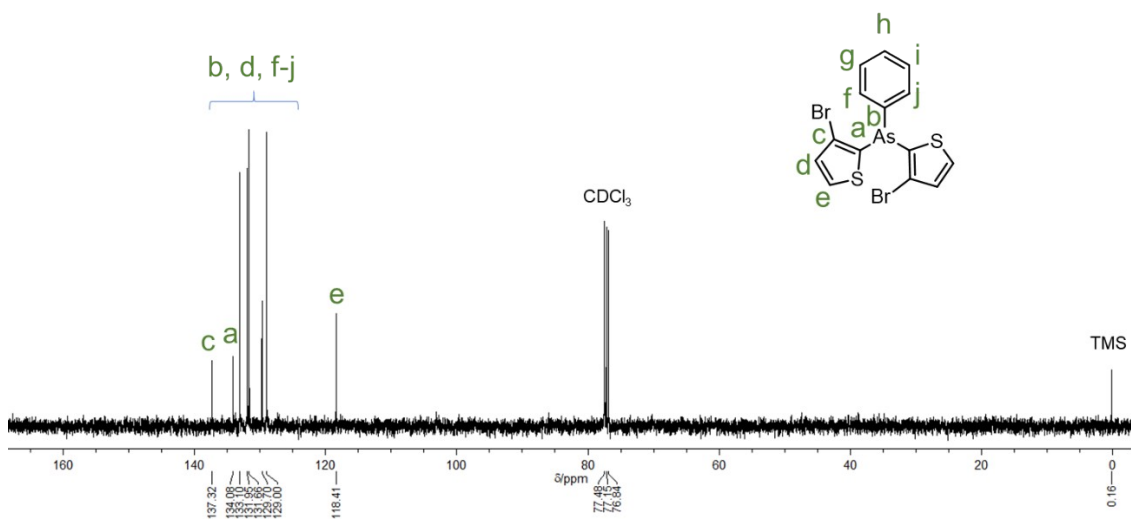

**Figure S19.**  $^{13}\text{C-NMR}$  spectrum (100 MHz) of **2c** in  $\text{CDCl}_3$ .

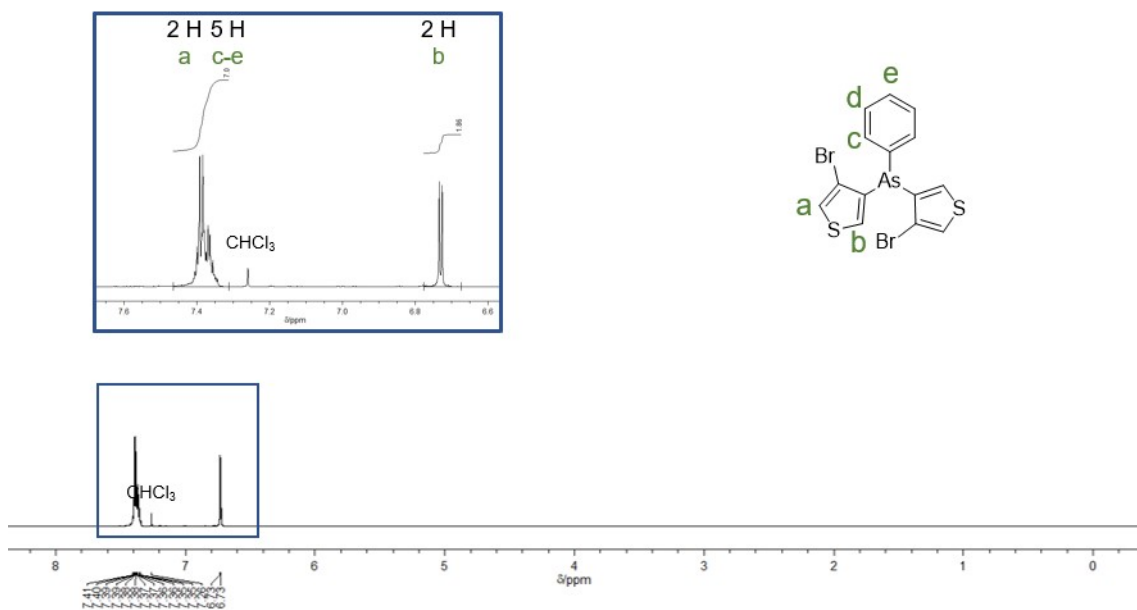

**Figure S20.**  $^1\text{H-NMR}$  spectrum (400 MHz) of **2d** in  $\text{CDCl}_3$ .

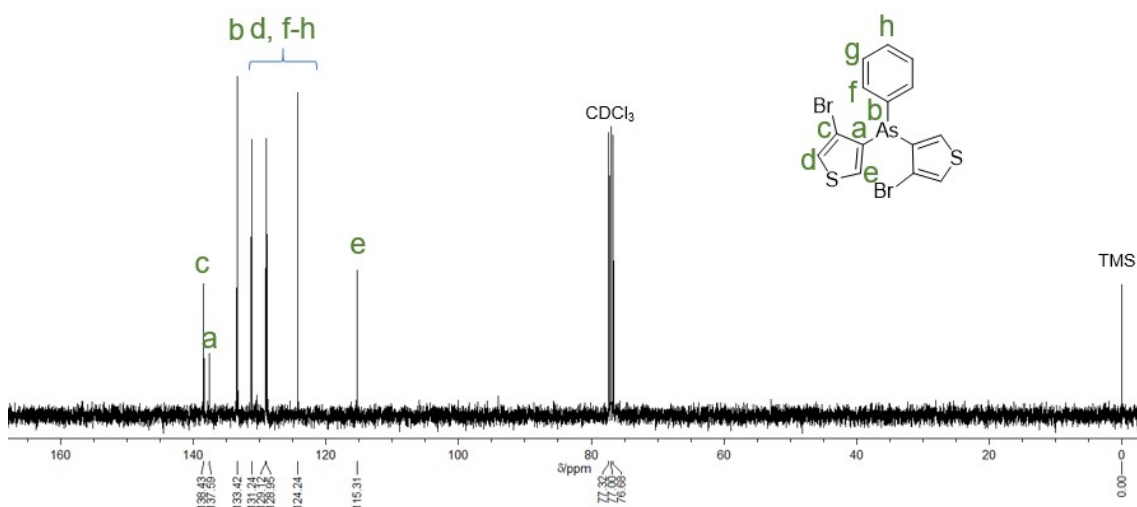

**Figure S21.**  $^{13}\text{C-NMR}$  spectrum (100 MHz) of **2d** in  $\text{CDCl}_3$ .

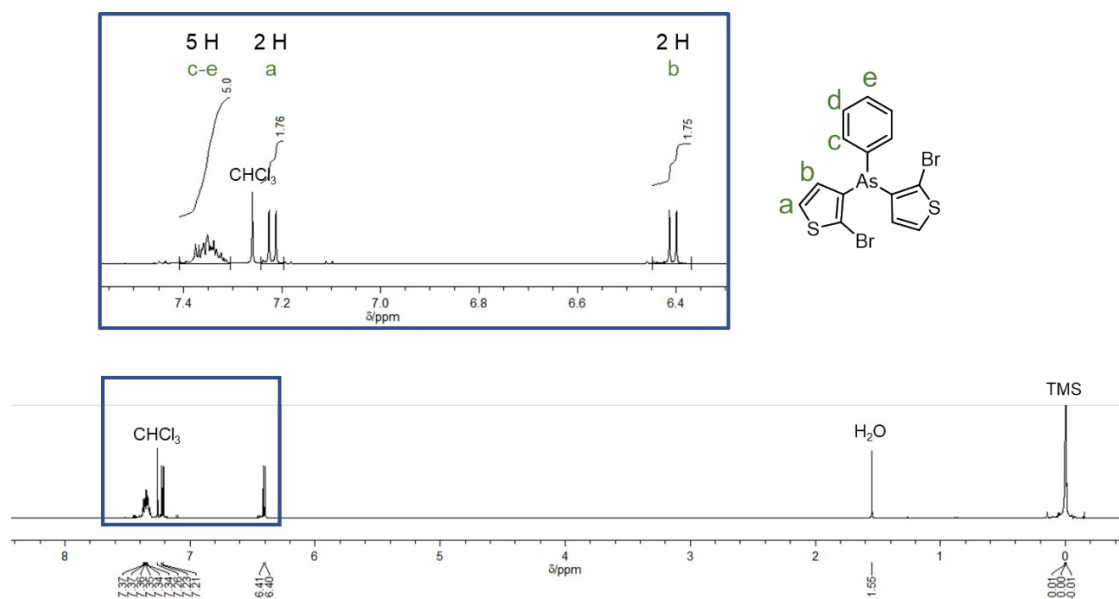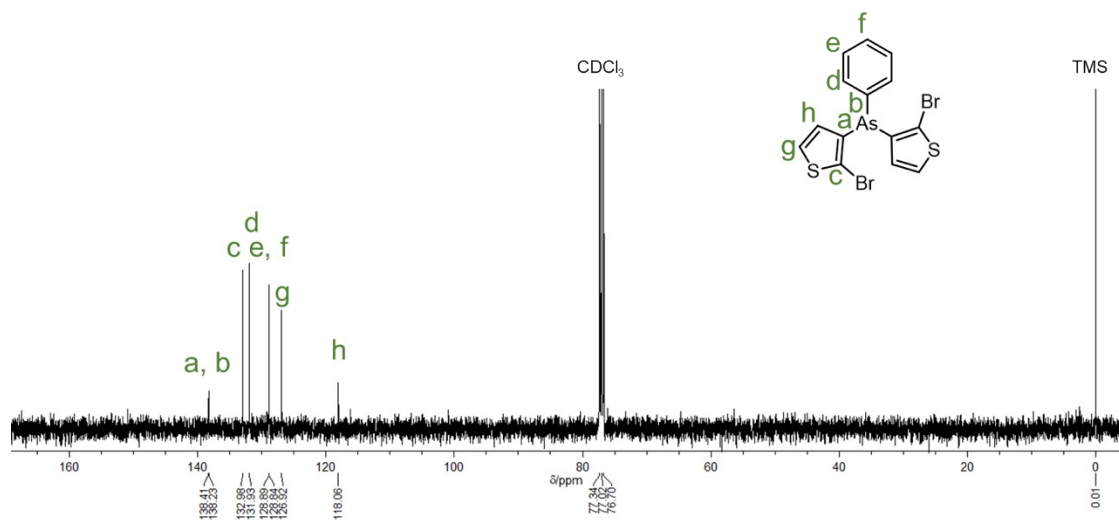

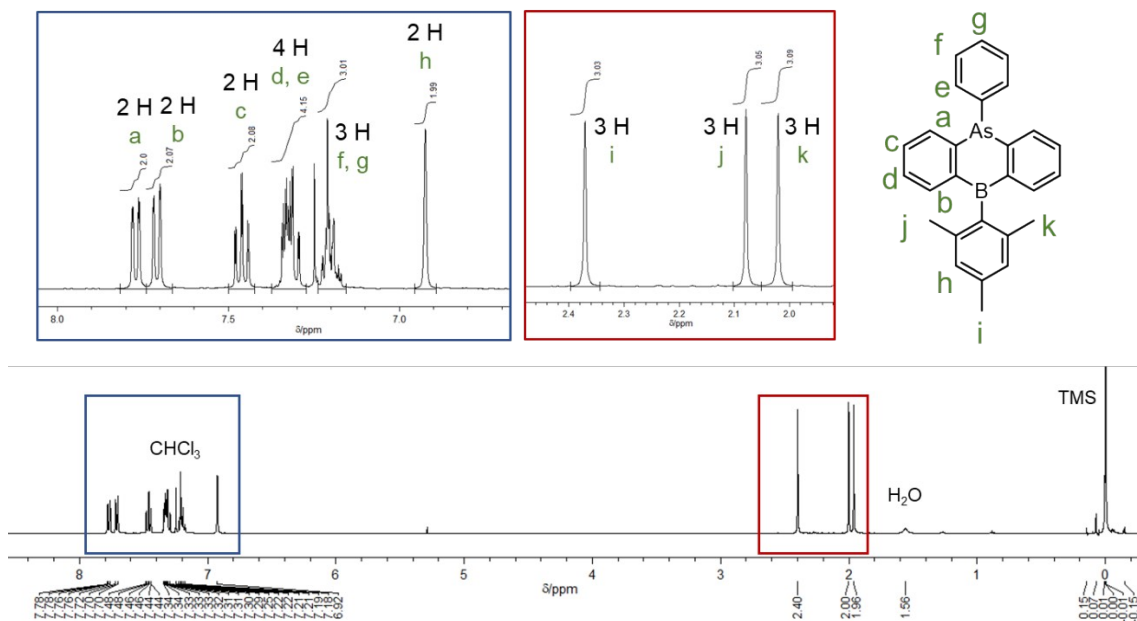

**Figure S24.**  $^1\text{H-NMR}$  spectrum (400 MHz) of **3a** in  $\text{CDCl}_3$ .

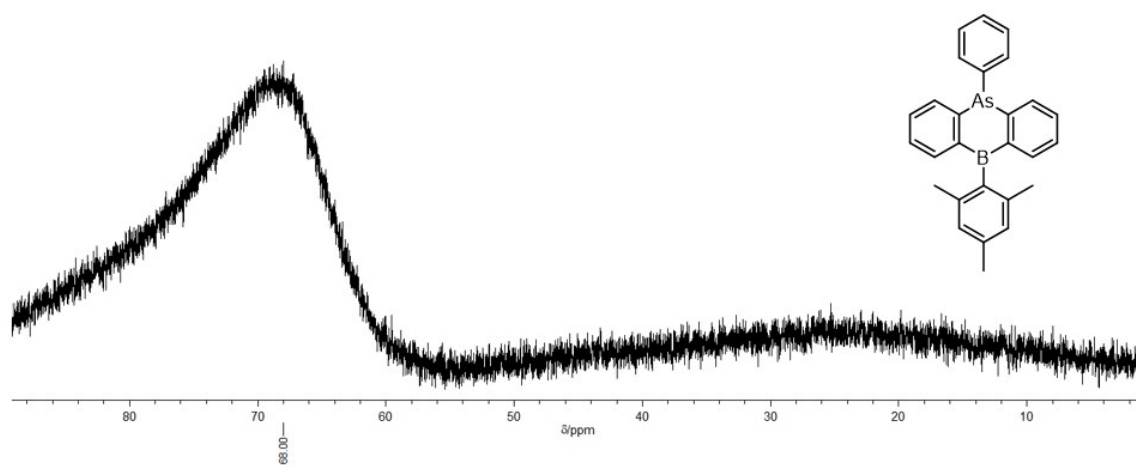

**Figure S25.**  $^{11}\text{B-NMR}$  spectrum (128 MHz) of **3a** in  $\text{CDCl}_3$ .

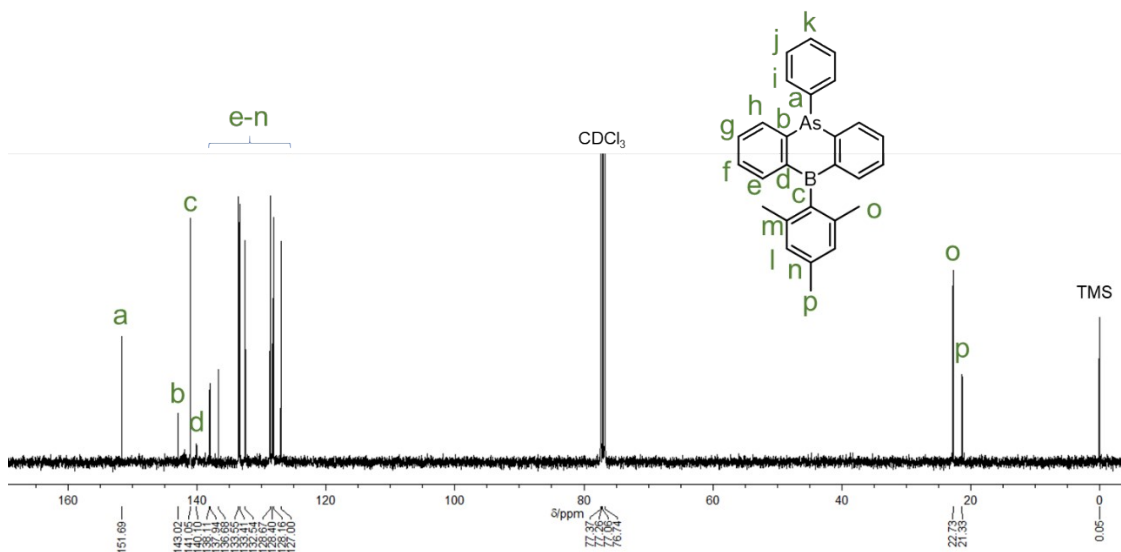

**Figure S26.**  $^{13}\text{C-NMR}$  spectrum (100 MHz) of **2e** in  $\text{CDCl}_3$ .

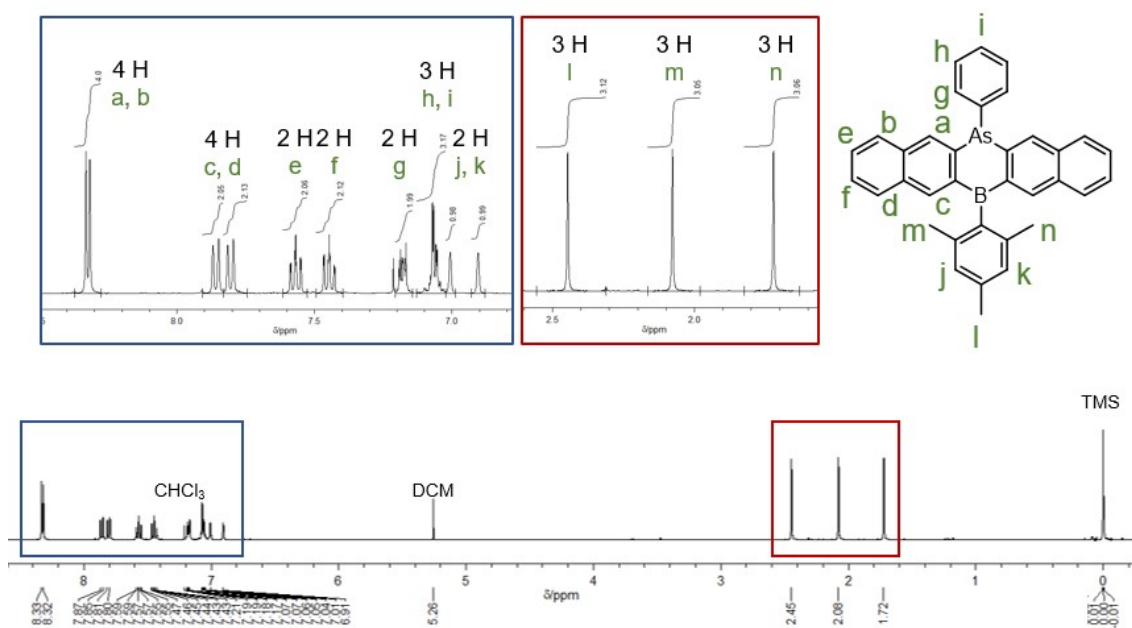

**Figure S27.**  $^1\text{H-NMR}$  spectrum (400 MHz) of **3b** in  $\text{CDCl}_3$ .

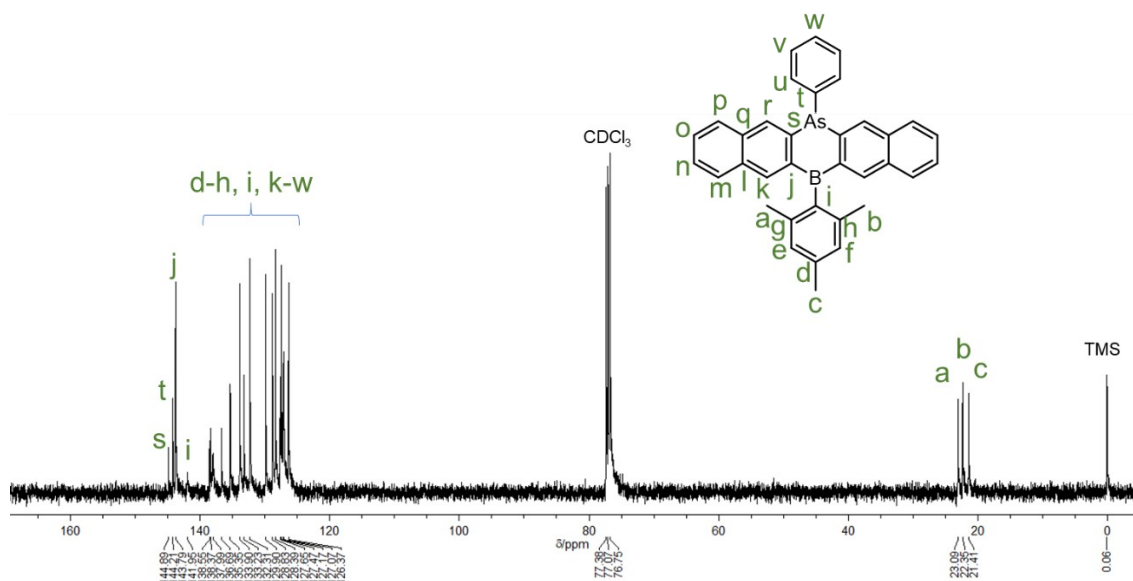

**Figure S28.**  $^{13}\text{C}$ -NMR spectrum (100 MHz) of **3b** in  $\text{CDCl}_3$ .

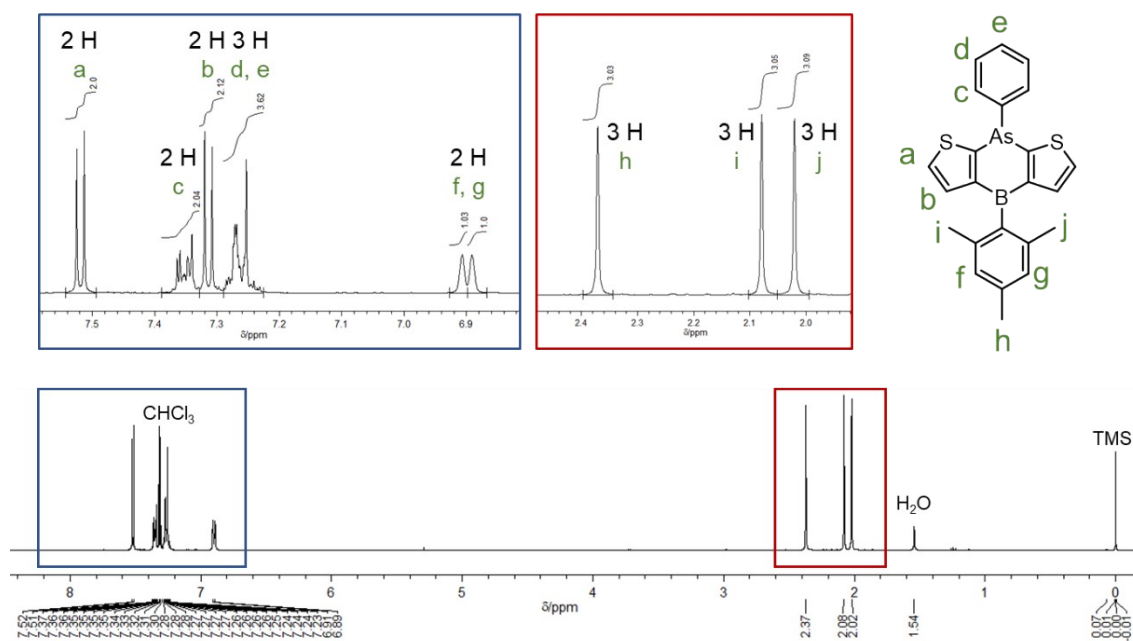

**Figure S29.**  $^1\text{H}$ -NMR spectrum (400 MHz) of **3c** in  $\text{CDCl}_3$ .

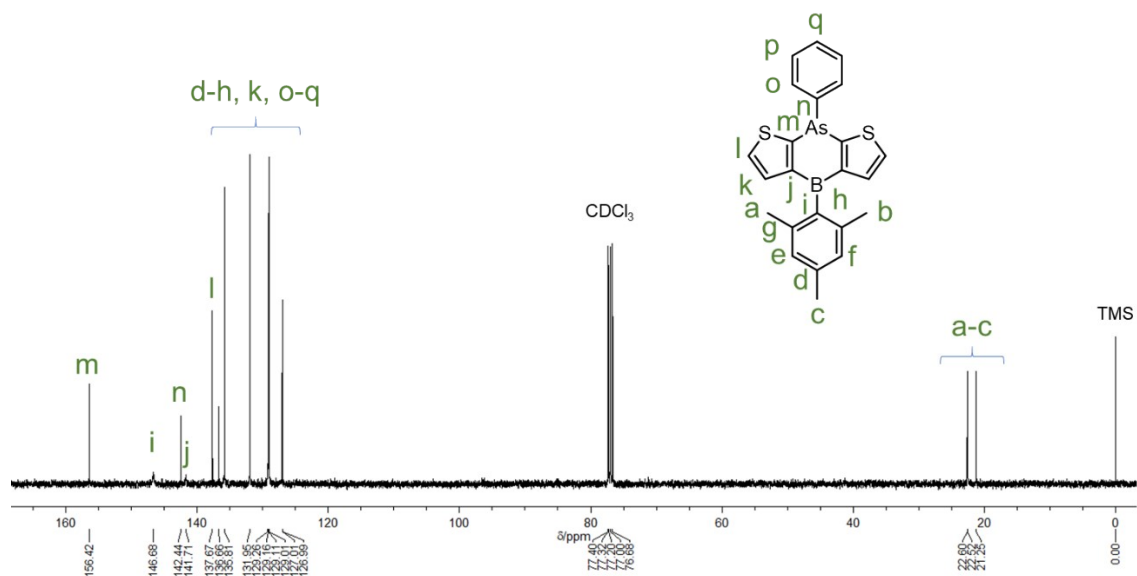

Figure S30.  $^{13}\text{C}$ -NMR spectrum (100 MHz) of **3c** in  $\text{CDCl}_3$

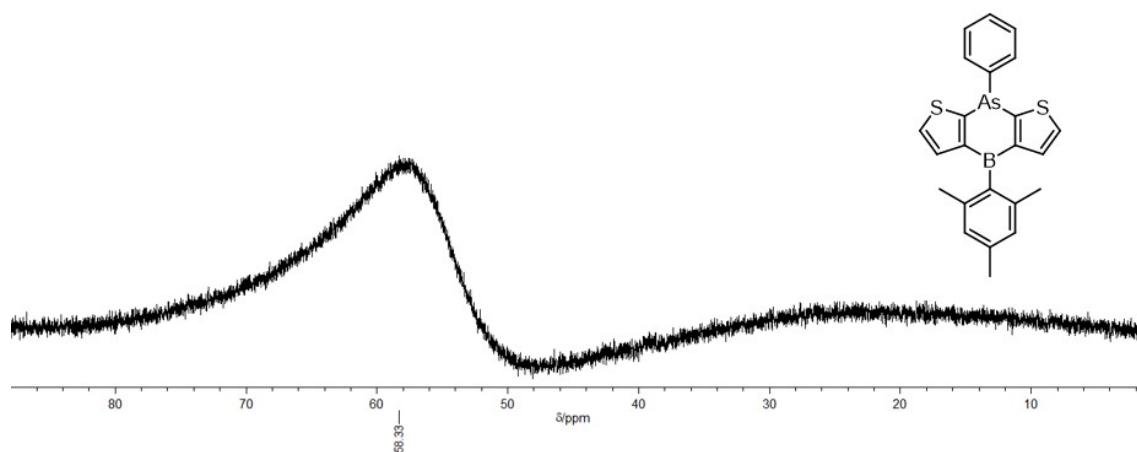

Figure S31.  $^{11}\text{B}$ -NMR spectrum (128 MHz) of **3c** in  $\text{CDCl}_3$ .



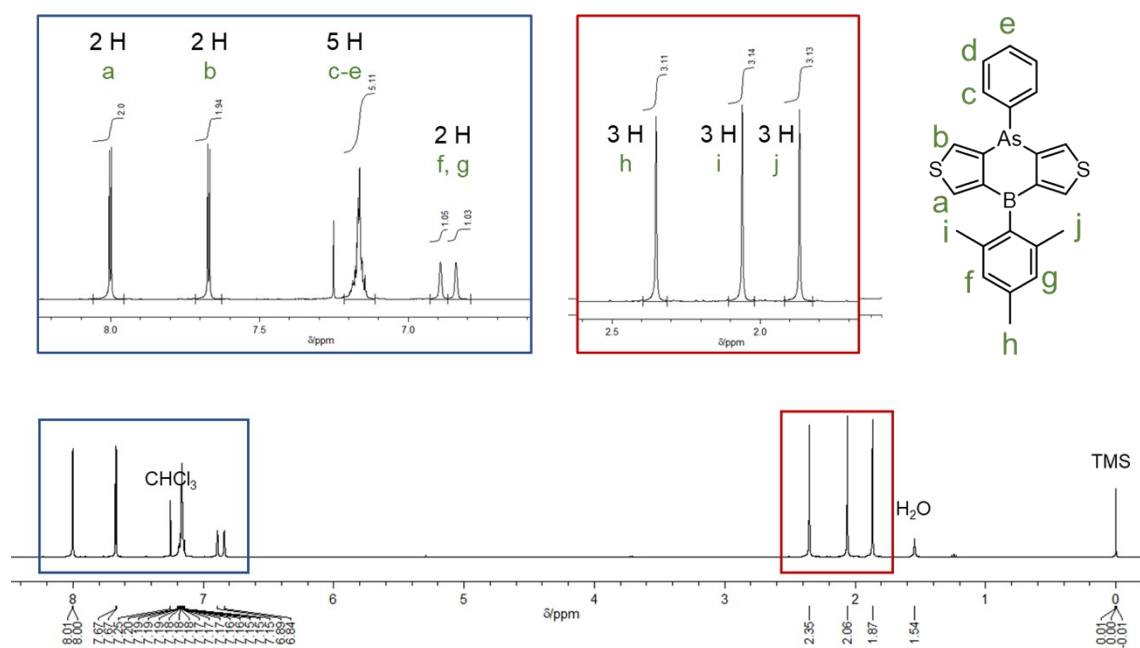

**Figure S32.**  $^1\text{H-NMR}$  spectrum (400 MHz) of **3d** in  $\text{CDCl}_3$ .

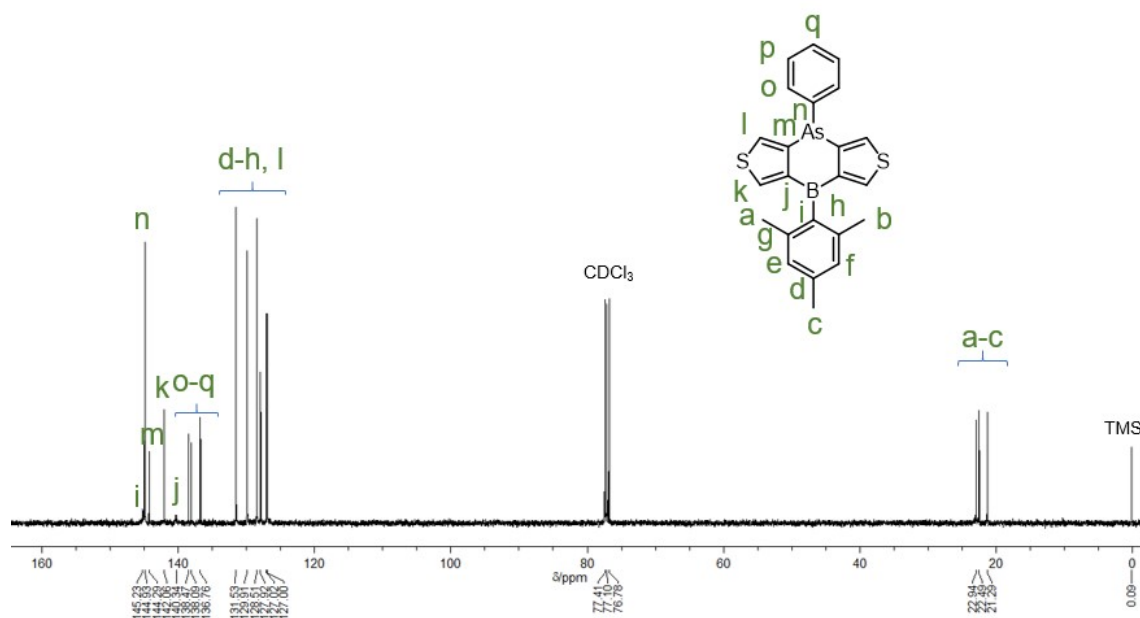

**Figure S33.**  $^{13}\text{C-NMR}$  spectrum (100 MHz) of **3d** in  $\text{CDCl}_3$ .

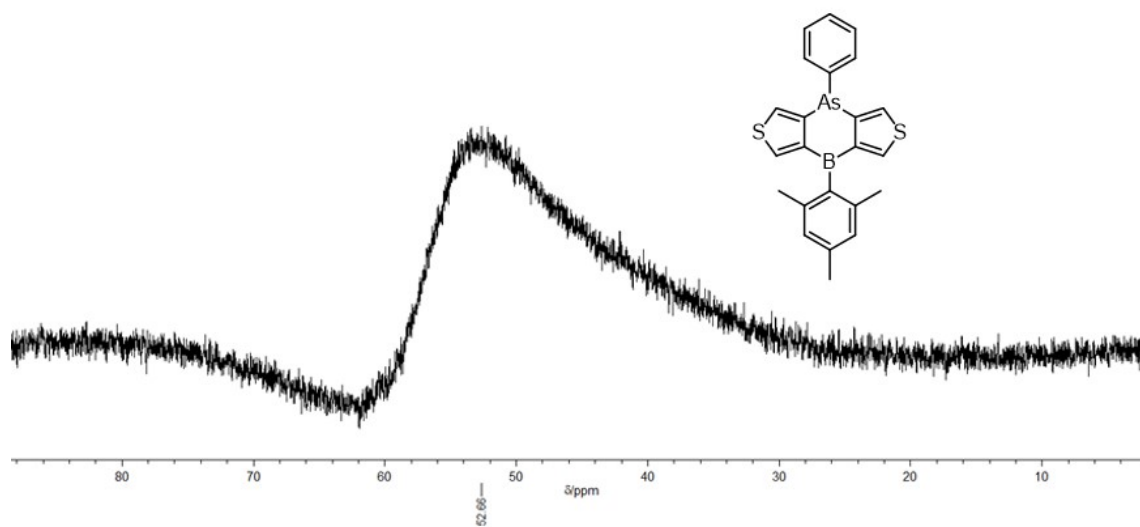

**Figure S34.**  $^{11}\text{B}$ -NMR spectrum (128 MHz) of **3d** in  $\text{CDCl}_3$ .

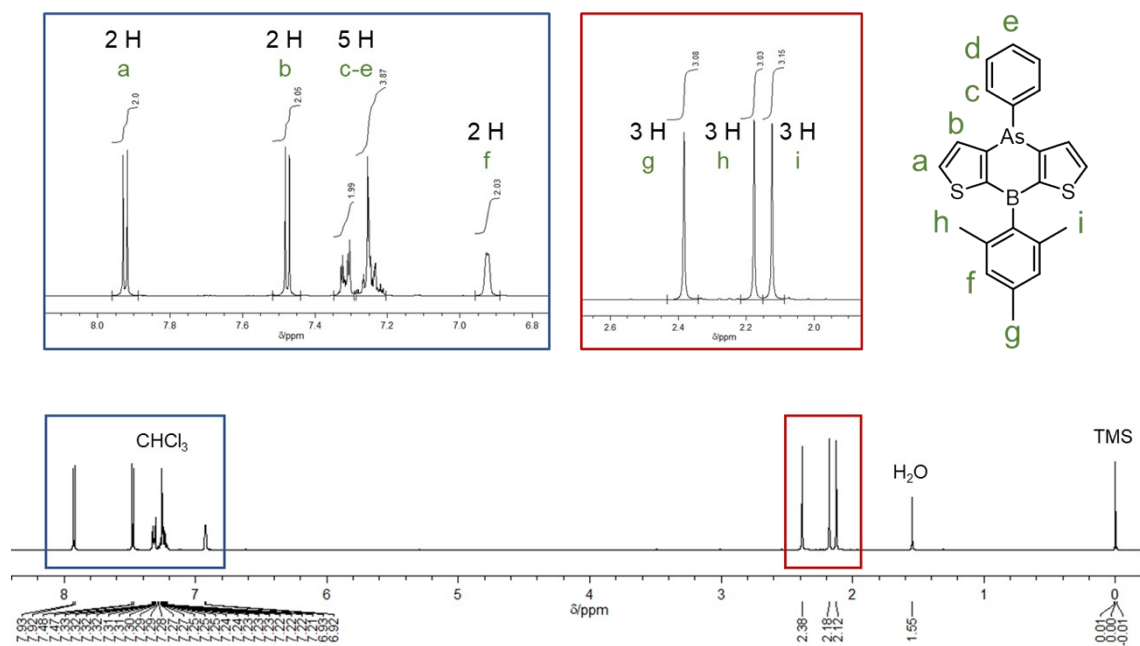

**Figure S35.**  $^1\text{H}$ -NMR spectrum (400 MHz) of **3e** in  $\text{CDCl}_3$ .

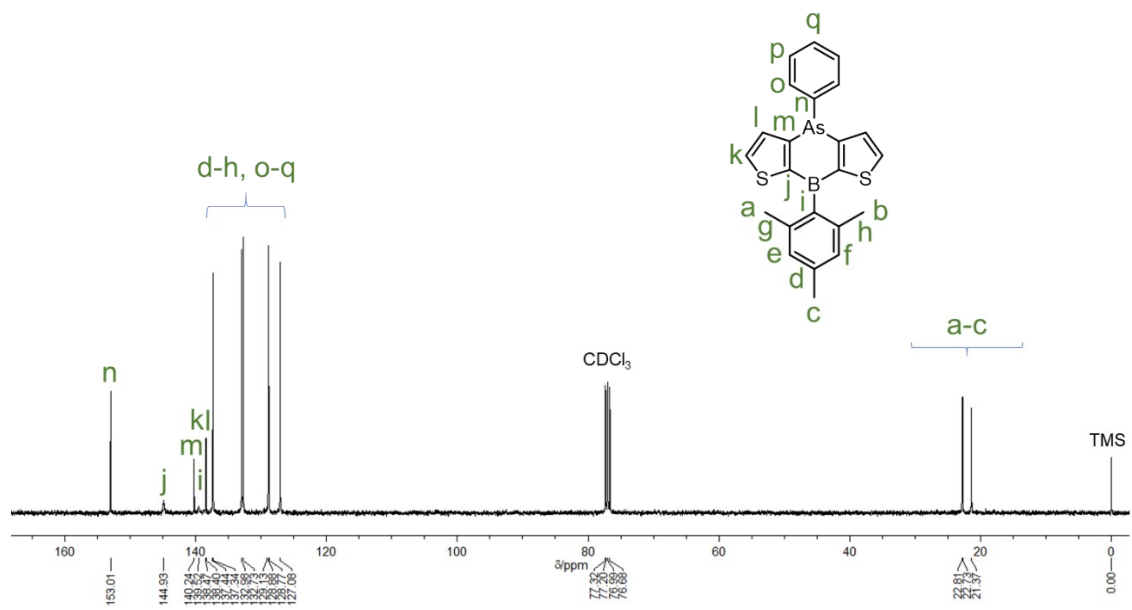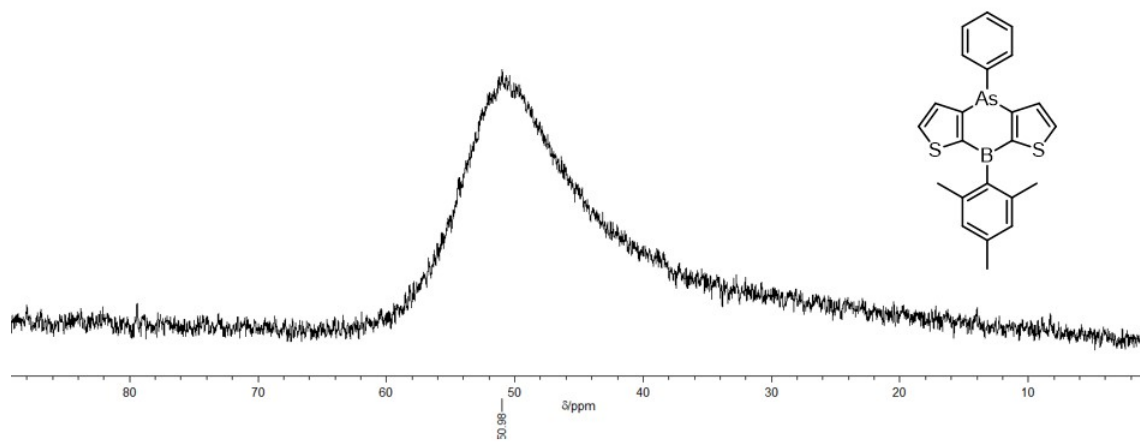

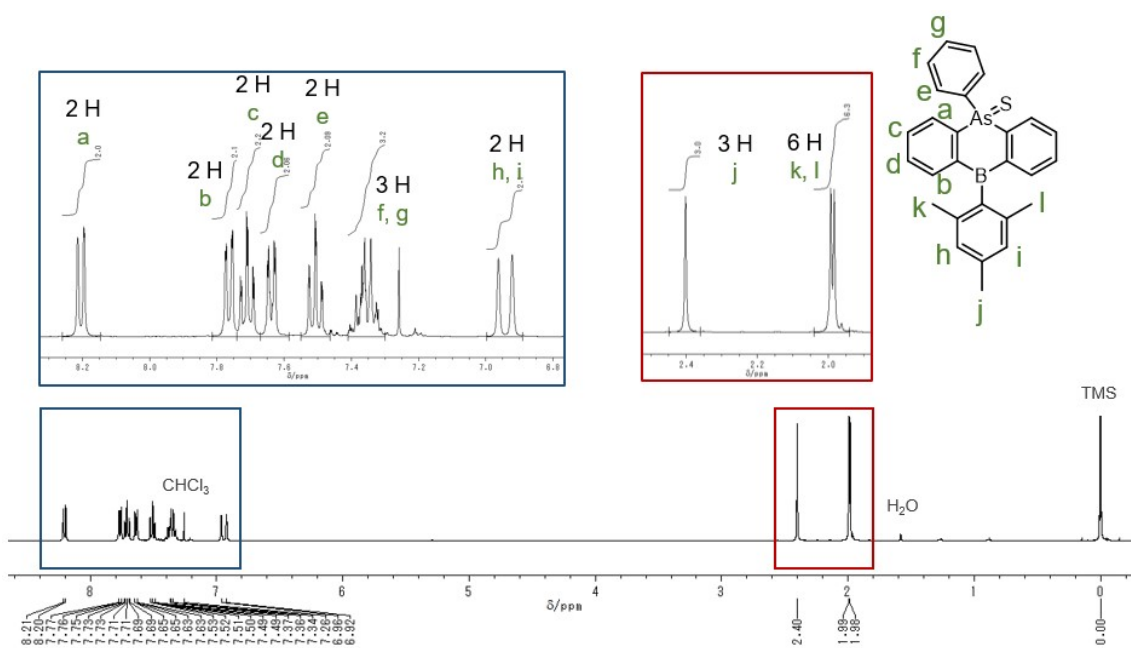

**Figure S38.** <sup>1</sup>H-NMR spectrum (400 MHz) of 3a-S in CDCl<sub>3</sub>.

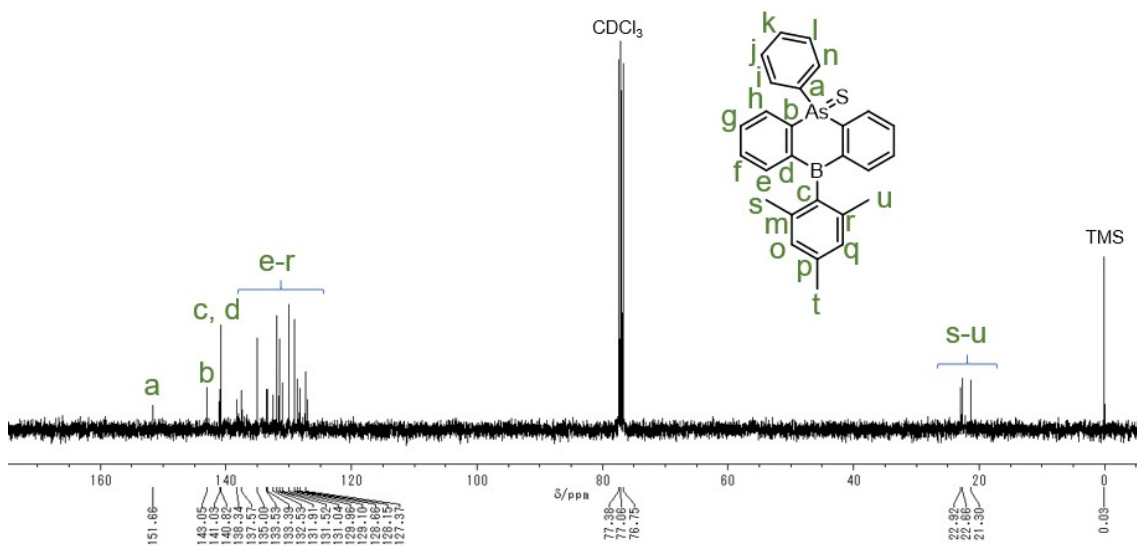

**Figure S39.** <sup>13</sup>C-NMR spectrum (100 MHz) of 3a-S in CDCl<sub>3</sub>.

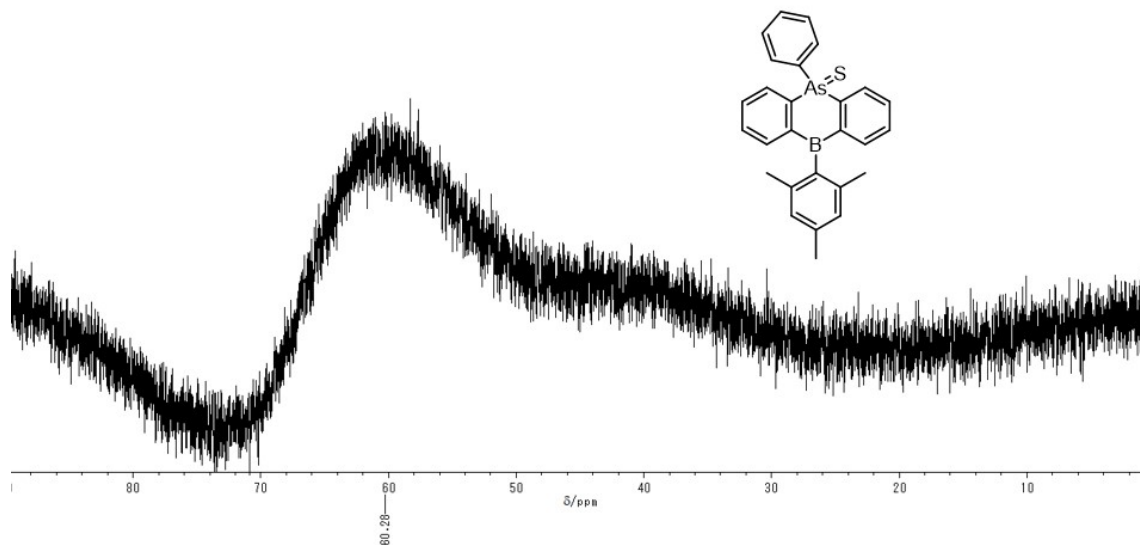

**Figure S40.**  $^{11}\text{B}$ -NMR spectrum (128 MHz) of **3a-S** in  $\text{CDCl}_3$ .

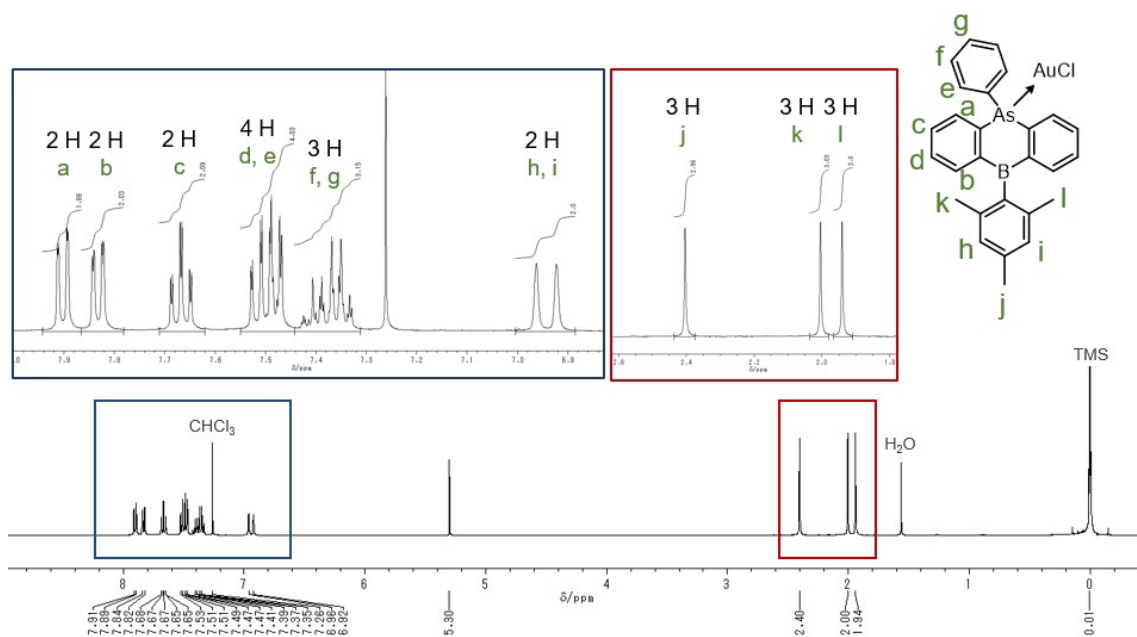

**Figure S41.**  $^1\text{H}$ -NMR spectrum (400 MHz) of **3a-AuCl** in  $\text{CDCl}_3$ .

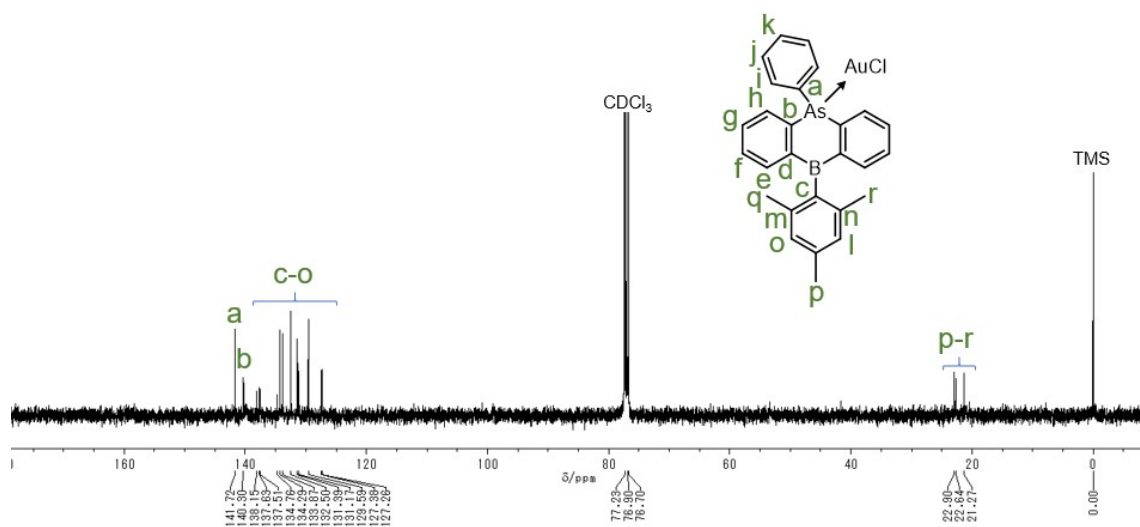

**Figure S42.**  $^{13}\text{C}$ -NMR spectrum (100 MHz) of **3a-AuCl** in  $\text{CDCl}_3$ .
